## Hybridization disrupts growth-defense strategies and reveals trade-offs masked in unadmixed populations of a perennial plant.

Karl C. Fetter<sup>a,b</sup>, David M. Nelson<sup>c</sup>, Stephen R. Keller<sup>b</sup>

<sup>a</sup>Department of Plant Biology, University of Georgia

<sup>b</sup>Department of Plant Biology, University of Vermont

<sup>c</sup>Appalachian Laboratory, University of Maryland Center for Environmental Science

Corresponding authors: Stephen R. Keller (e-mail: [skeller@uvm.edu](mailto:skeller@uvm.edu), tel: +1 802 656 2930).

⋮ **ABSTRACT** Organisms are constantly challenged by pathogens and pests which can drive the evolution of growth-defense strategies. Plant stomata are essential for gas-exchange during photosynthesis and conceptually lie at the intersection of the physiological demands of growth and exposure to foliar fungal. Generations of natural selection for locally adapted growth-defense strategies can eliminate variation between traits, potentially masking trade-offs and selection conflicts that may have existed in the past. Hybrid populations offer a unique opportunity to reset the clock on selection and to study potentially maladaptive trait variation before selection removes it. We study the interactions of growth, stomatal, ecophysiological, and disease resistance traits in Poplars (*Populus*) after infection by the leaf rust *Melampsora medusae*. Phenotypes were measured in a common garden and genotyped at 227K SNPs. We isolate the effects of hybridization on trait variance, discover correlations between stomatal, ecophysiology and disease resistance, examine trade-offs and selection conflicts, and explore the evolution of growth-defense strategies potentially mediated by selection for stomatal traits on the upper leaf surface. These results suggest an important role for stomata in determining growth-defense strategies in organisms susceptible to foliar pathogens, and reinforces the contribution of hybridization studies towards our understanding of trait evolution.

⋮ **INDEX TERMS** Hybridization, trade-offs, growth strategy, *Populus*, *Melampsora*, plant pathology.

## 14 I. INTRODUCTION

15 Trade-offs arise when selection on fitness is constrained by a negative correlation between a component of fitness and another  
16 quantitative trait (Schluter et al., 1991). In plants, an important life history trade-off is between size and the age of first  
17 reproduction, with delayed reproduction correlating to longer fertility of the parent and higher quality offspring. However,  
18 long-lived organisms like trees must cope with numerous natural enemies, and delaying reproduction can come at a high cost if  
19 an organism risks dying before reaching reproductive maturity. Plants have evolved a complex set of constitutive and inducible  
20 defenses to cope with their enemies, but they nearly always come at a cost to a component of fitness (Obeso, 2002).

21 Depending on pathogen prevalence, plant life histories generally evolve towards increased investment in defensive enzymes  
22 and compounds paired with slower growth, or decreased investment in defense paired with faster growth (Obeso, 2002). The  
23 fast-slow trade-off has been consistently identified in annuals (Tian et al., 2003), perennials (Messina et al., 2002), and long-  
24 lived trees (McKown et al., 2014; McKown et al., 2019), although this hypothesis is not without its critics (Kliebenstein,  
25 2016). At the molecular level, the growth-defense trade-off is regulated by cellular signaling and hormonal regulation to direct  
26 metabolic activity away from growth and towards defense, or vice versa (Tian et al., 2003; Chandran et al., 2014). Host plant  
27 species may evolve a variety of costly defenses to combat disease, including the evolution of structural phenotypes to reduce  
28 exposure to pathogens (Gonzales-Vigil et al., 2017), immune systems to detect pathogens (Dangl and Jones, 2001) in order  
29 to initiate appropriate responses (Melotto et al., 2006), and resistance via constitutive or inducible synthesis of defensive  
30 compounds (Ullah et al., 2018). Hosts may also avoid disease by colonizing new environments where the pathogen is absent  
31 (Bruns et al., 2018), or by evolving life history strategies that avoid or compensate for pathogen exposure (Obeso, 2002).

32 Hybridization is an important mechanism for evolutionary change and has been implicated in multiple phenomena, including  
33 the maintenance of species boundaries due to negative selection on advanced generation hybrids (Christe et al., 2016),  
34 introgression of beneficial alleles across species barriers (Chhatre et al., 2018), and speciation (Goulet et al., 2017). Phenotypic  
35 distributions in hybrid populations often differ from their parental species in important ways. Hybrid vigor, or heterosis, is the  
36 enhancement of trait values in early generation hybrids that is a useful tool in crop breeding to increase yields of harvestable  
37 organs. Transgressive segregation is a similar concept where trait values in hybrids are elevated or depressed in reference to  
38 their parental species (Goulet et al., 2017). Disease resistance will respond to hybridization and can yield undesirable results.  
39 For example, hybrid *Salix eriocephala* x *sericea* exhibit a decrease in disease resistance to willow leaf rust (*Melampsora* sp.)  
40 by a factor of 3.5 in comparison to their unadmixed parents (Roche and Fritz, 1998). The phenotypic integration of traits that  
41 have experienced locally adaptive selection for optimal growth strategies may be disrupted after the arrival of reproductively  
42 compatible congeners or genetically divergent demes within the same species that have experienced selection for a different  
43 growth strategy. Thus, it is apparent that hybridization can have beneficial and deleterious effects on fitness, but the role of  
44 hybridization in disrupting locally adaptive growth strategies and revealing fitness trade-offs that are not evident within the  
45 parental species has been little explored.

46 One scenario where a trade-off between plant growth and defense may arise is the relationship between stomatal traits and  
47 infection by fungal pathogens. Stomata are microscopic valves on the surface of the leaf that regulate gas exchange during

48 photosynthesis. Some foliar pathogens enter their hosts via stomata by sensing the topography of the leaf surface for guard  
49 cells, and forming an appressorium over a stoma from which a penetration peg grows to invade the mesophyll tissue (Allen  
50 et al., 1991). As a dispersal cloud of pathogenic foliar fungal spores moves through an environment containing susceptible  
51 hosts, spores will land on the upper and lower leaf surfaces and begin their search for stomata. Physiological models of the  
52 benefits and costs to arranging stomata on the upper and/or lower leaf surfaces indicate improved efficiency of transpiration  
53 when equal densities of stomata are found on each surface (Muir, 2015). However, leaves may be more prone to infection if the  
54 upper leaf surface bears stomata and the risk of pathogen colonization is increased. Here, we see the conditions for the evolution  
55 of a growth-defense trade-off mediated by selection on stomata. Hybridization may be expected to shift genotypes along the  
56 growth-defense continuum, and when competing growth strategies that rely on various distributions of stomatal architecture  
57 traits meet in a hybrid, we may expect a mismatch between optimal growth and defense strategies to yield decreased disease  
58 resistance.

59 In this study, we test for the effects of hybridization on disease resistance, stomatal traits, and growth, and use hybridization as  
60 a tool to potentially reveal trade-offs, selection conflicts, and the evolution of different growth strategies between unadmixed and  
61 admixed genotypes. We use a sample of naturally formed hybrids between North American poplars infected by the same leaf  
62 rust, *Melampsora medusae*. We specifically ask the following questions: 1) how does hybridization change trait distributions,  
63 and does it alter their heritable variation; 2) which traits are most predictive of disease resistance; 3) are selection trade-offs  
64 and conflicts between growth, disease resistance, and gas exchange observed in hybrids that are not observed in unadmixed  
65 populations; and 4) can we identify competing growth-defense strategies in different sets of hybrids potentially fine-tuned by  
66 stomatal traits?

## 67 II. MATERIALS & METHODS

### 68 A. STUDY SYSTEM

69 Poplars (*Populus*) are a genus of predominantly holarctic tree species. Extensive hybridization between species within a section  
70 of the genus, as well as between some sections, make the taxonomy of the genus difficult, with some authors identifying 29 to  
71 as many as 60 species (DiFazio et al., 2011). Hybrids can be formed from species pairs within and between *Populus* sections  
72 *Tacamahaca* and *Aigeiros*, and extensive hybrid zones spontaneously form where the ranges of two reproductively compatible  
73 species meet (Suarez-Gonzalez et al., 2018). Western North America contains several well documented hybrid zones (Chhatre  
74 et al., 2018; Suarez-Gonzalez et al., 2018), including a tri-hybrid zone in Alberta, Canada (Floate et al., 2016). The disease  
75 we study is from the fungal leaf pathogen *Melampsora medusae* (Fig. 1c,d), a macrocyclic basidiomycete whose aecial host is  
76 a larch (*Larix*), and telial host is a poplar. Uredospores (N + N) will emerge from a hyphal mass of tissue (uredinium) and are  
77 able to clonally reproduce on poplar leaves within a single season. The closely related *M. larici-populina* is an agricultural pest  
78 that can reduce yields of hybrid poplars grown in agroforestry (Feau et al., 2007).

## 79 **B. PLANT MATERIALS**

80 In this study, we work with hybrids crossed between a balsam poplar (*P. balsamifera*), and either a black cottonwood (*P.*  
81 *trichocarpa*), a narrow-leaf cottonwood (*P. angustifolia*), or an eastern cottonwood (*P. deltoides*, Fig 1b). We lack information  
82 on the which species served as the maternal vs. paternal parent for each hybrid, and adopt the convention of listing the *P.*  
83 *balsamifera* parent first. During winter 2013, dormant stem cuttings were collected from 534 trees from 59 populations spanning  
84 9 Canadian provinces and 7 US States (longitudes -55 to -128 °W and latitudes 39 to 60 °N; Fig. 1a, Table S1). The main focus  
85 of the 2013 collection was to sample *P. balsamifera* cuttings, but as the trees were dormant and some of the diagnostic traits  
86 were not immediately visible, a number of putative hybrids were also collected. We collected 32 presumably unadmixed eastern  
87 cottonwood (*P. deltoides*) genotypes from central Vermont, USA to serve as a reference population for identifying admixed *P.*  
88 *deltoides* hybrids with population genetic methods. For the 2013 collection, cuttings were grown for one year in a greenhouse,  
89 and then planted in the summer of 2014 in a common garden near Burlington, VT (44.444422 °N, -73.190164 °W). Replicates  
90 were planted in a randomized design with 2x2 meter spacing and 1,000 ramets were planted. Plants were not fertilized, but  
91 were irrigated as-needed during the 2014 growing season to ensure establishment, and then received no supplemental water.

## 92 **C. MOLECULAR DATA**

93 Fresh foliage from greenhouse grown plants was used for extracting whole genomic DNA using DNeasy 96 Plant Mini Kits  
94 (Qiagen, Valencia, CA, USA). DNA was quantified using a fluorometric assay (Qubit BR, Invitrogen) and confirmed for  
95 high molecular weight using 1% agarose gel electrophoresis. We used genotyping-by-sequencing (GBS) (Elshire et al., 2011)  
96 to obtain genome-wide polymorphism data for all 534 trees. Genomic sequencing libraries were prepared from 100 ng of  
97 genomic DNA per sample digested with EcoT221 followed by ligation of barcoded adapters of varying length from 4-8 bp,  
98 following Elshire et al. (2011). Equimolar concentrations of barcoded fragments were pooled and purified with QIAquick PCR  
99 purification kit. Purified products were amplified with 18 PCR cycles to append Illumina sequencing primers, cleaned again  
100 using a PCR purification kit. The resulting library was screened for fragment size distribution using a Bioanalyzer. Libraries  
101 were sequenced at 48 plex (i.e., each library sequenced twice) using an Illumina HiSeq 2500 to generate 100 bp single end  
102 reads. Cornell University Institute of Genomic Diversity (Ithaca, NY) performed the library construction and sequencing steps.  
103 For the *P. deltoides* reference population, library preparation was performed using the same protocol. DNA sequencing was  
104 performed on an Illumina HiSeq 2500 at the Vermont Genetics Network core facility. Raw sequences reads are deposited in  
105 NCBI SRA under accession number SRP070954.

106 We employed the Tassel GBS Pipeline (Glaubitz et al., 2014) to process raw sequence reads and call variants and genotypes.  
107 In order to pass the quality control, sequence reads had to have perfect barcode matches, the presence of a restriction site  
108 overhang and no undecipherable nucleotides. Filtered reads were trimmed to 64 bp and aligned to the *P. trichocarpa* reference  
109 assembly version 3.0 (Tuskan et al., 2006) using the Burrows-Wheeler Aligner (BWA) (Li and Durbin, 2009). Single nucleotide  
110 polymorphisms (SNPs) were determined based on aligned positions to the reference, and genotypes called with maximum  
111 likelihood in Tassel (Glaubitz et al., 2014). SNP genotype and sequence quality scores were stored in Variant Call Format v4.1

112 (VCF) files, which were further processed with VCFTools 0.1.11 (Danecek et al., 2011). SNPs with a minor allele frequency <  
113 0.001 were removed, and only biallelic sites were retained. Sites with with a mean depth < 5, genotype quality > 90, and indels  
114 were removed. Missing data were imputed with Beagle v5.0 (Browning et al., 2018), and sites with post-imputation genotype  
115 probability < 90 and sites with any missingness were removed. After filtering, the final dataset contained 227,607 SNPs for  
116 downstream analyses.

117 Filial generation was estimated separately for BxT and BxD hybrids using NewHybrids (Anderson and Thompson, 2002).  
118 Filial generations of *P. balsamifera* x *angustifolia* genotypes were previously estimated by Chhatre et al. (2018). NewHybrids  
119 requires reference populations for each species, and *P. trichocarpa* reference genotypes were downloaded from previously  
120 published work and 25 genotypes were selected from Pierce Co, Washington from populations known to lack admixture with *P.*  
121 *balsamifera* (Evans et al., 2014). *P. deltoides* reference genotypes were collected from the Winooski and Mad River watersheds  
122 in central Vermont. The reference population for *P. balsamifera* was selected from individuals in the SLC, LON, and DPR  
123 populations that are known to lack admixture with other *Populus* species (Chhatre et al., 2019). To select loci for distinguishing  
124 filial generations, we determined the locus-wise  $F_{ST}$  difference between reference populations. For the BxT analysis, 355 loci  
125 with an  $F_{ST}$  difference greater than 0.8 were randomly selected. In the BxD analysis, 385 loci that segregated completely  
126 between parental species (i.e.  $F_{ST}$  difference = 1) were randomly sampled. NewHybrids was run using Jeffrey's prior for  $\pi$  and  
127  $\theta$  for 200,000 sweeps with 100,000 discarded as burn-in. The expected proportion of the genome from each parental species  
128 was calculated as:

$$\text{Expected ancestry proportion} = \frac{(2^n - 1)}{2^n} \quad (1)$$

129 where n = the number crossing events. The admixture status (i.e. admixed/unadmixed) and hybrid set (i.e. BxB, BxT, BxA,  
130 or BxD) was determined from the expected ancestry proportions.

#### 131 **D. TRAIT DATA**

132 All traits were measured from common garden grown trees in 2015, and disease severity was measured again in 2016 (Table 1).  
133 To control for trait variation between leaves due to age or environmental effects (e.g. aspect, or light), the first fully expanded  
134 leaf on the dominant shoot was sampled. Stomatal patterning and ecophysiology traits were measured from the same leaf. The  
135 severity of naturally inoculated leaf rust disease was phenotyped in both years using an ordinal scale from zero to four created  
136 by LaMantia et al. (2013) where: 0 = no uredinia visible, 1 = less than five uredinia per leaf on less than five leaves, 2 = less than  
137 five uredinia per leaf on more than five leaves, 3 = more than five uredinia per leaf on more than five leaves, and 4 = more than  
138 five uredinia on all leaves. Disease severity was converted to resistance ( $R$ ) with the function  $R = -1 \times \text{Severity} + 6$ . A mature  
139 larch tree (approx. 20m tall) was located approximately 100 m from the garden site, and we assume a uniform distribution of  
140 aeciospore inoculum into the garden. Using microscopy, the pathogen was visually confirmed as *M. meduscae* by the ellipsoid  
141 to obovoid shape of uredospores, the size range (mean = 28.3  $\mu\text{m}$ , min = 19.6  $\mu\text{m}$ , max = 34.45  $\mu\text{m}$ , N = 17), and the presence

142 of a smooth equatorial region on the spore flanked by polar regions with papillae (Van Kraayenoord et al., 1974) (Fig. 1c).

143 To collect isotopic, elemental, and specific leaf area (SLA) data, three hole punches (diameter = 3 mm) were sampled in  
144 June 2015 from a central portion of each leaf adjacent to, but avoiding the central leaf vein. Hole punches were dried at 65  
145 °C to constant mass. Approximately 2 mg of foliar tissue from each sample was weighed into a tin capsule and analyzed for  
146 %C, %N,  $\delta^{13}\text{C}$ , and  $\delta^{15}\text{N}$  using a Carlo Erba NC2500 elemental analyzer (CE Instruments, Milano, Italy) interfaced with  
147 a ThermoFinnigan Delta V+ isotope ratio mass spectrometer (Bremen, Germany) at the Central Appalachians Stable Isotope  
148 Facility (CASIF) at the Appalachian Laboratory (Frostburg, Maryland, USA). %C and %N were calculated using a size series of  
149 atropine. The  $\delta^{13}\text{C}$  and  $\delta^{15}\text{N}$  data were normalized to the VPDB and AIR scales, respectively, using a two-point normalization  
150 curve with laboratory standards calibrated against USGS40 and USGS41. The long-term precision of an internal leaf standard  
151 analyzed alongside samples was 0.28‰ for  $\delta^{13}\text{C}$  and 0.24‰ for  $\delta^{15}\text{N}$ . Isotopic results are reported in units of per mil (‰).  
152 Carbon isotope discrimination against  $^{13}\text{C}$  ( $\Delta^{13}\text{C}$ ) was calculated according to Farquhar et al. (1982) as:

$$\Delta^{13}\text{C} = (\delta^{13}\text{C}_a - \delta^{13}\text{C}_i)/(1 + \delta^{13}\text{C}_i) \quad (2)$$

153 where the  $\delta^{13}\text{C}_a$  value (-8.456 ‰) was the mean value in 2015 measured at NOAA Mauna Loa observatory (White et al.,  
154 2011). Higher  $\Delta^{13}\text{C}$  values indicate increased intracellular ( $C_i$ ) relative to atmospheric ( $C_a$ )  $\text{CO}_2$  concentrations as a result of  
155 greater stomatal conductance and/or lower photosynthetic assimilation rates in  $\text{C}_3$  plants.  $\Delta^{13}\text{C}$  is a useful metric of intrinsic  
156 water-use efficiency (WUE), or the ratio of photosynthesis to stomatal conductance, since both are influenced by  $C_i/C_a$ . To  
157 calculate SLA, or the ratio of fresh punch area to dry leaf mass, three oven dried hole punches per leaf were massed collectively.  
158 Relative growth rate (G) was measured as the height increment gain (cm) between the apical bud in 2015 and the previous year's  
159 bud scar on the most dominant stem. The chlorophyll content index (CCI) was measured with a Konica Minolta SPAD 502  
160 (Konica Minolta Sensing Americas, Inc) and the average of three measurements from the central portion of a leaf was recorded.

161 Stomata patterning traits were measured from micrographs of nail polish casts of the lower (abaxial) and upper (adaxial) leaf  
162 surfaces. Leaves were collected from the field and placed in a cooler until processed in the lab. Nail polish peels were made  
163 and mounted on slides without a cover slip. Two non-overlapping areas without large veins from each peel were imaged ( $N =$   
164 1894) with an Olympus BX-60 microscope using differential interference contrast. Stomata density ( $D$ ) was estimated using  
165 the machine learning protocol of StomataCounter (Fetter et al., 2019). To verify the automatic counts, stomata were manually  
166 annotated on each image using the image annotation tool. The correlation between automatic and manual count was  $r = 0.99$ ,  
167 automatic counts were used. Stomatal aperture pore length was measured from micrographs in ImageJ (Schneider et al., 2012)  
168 by overlaying four equally spaced lines across an image, and then measuring a single aperture pore from each segmented region  
169 for a total of five observations per image. Stomatal size ( $S$ ), stomatal cover ( $f_s$ ), defined as the covering fraction of the leaf  
170 surface by stomatal aperture pores, and theoretical maximum gas exchange ( $g_{s,\text{max}}$ ), were respectively calculated as

$$S = \pi \left( \frac{\text{pore length}}{2} \right)^2 \quad (3)$$

$$f_S = DS \quad (4)$$

$$g_{s,\max} = bmDS^{0.5} \quad (5)$$

171 where  $b$  is the diffusion coefficient of water vapor in air ( $b = 0.001111607$ ) and  $m$  is a morphological constraint of  
172 stomatal guard cell length and width, aperture pore length and depth ( $m = 0.4320532$ ; see Sack and Buckley, 2016 for details).  
173 Interstomatal distances ( $U$ ) were calculated separately for upper and lower leaf surfaces as

$$U = \left( \frac{2}{\sqrt{3}} D^{-1} \right)^{0.5} \quad (6)$$

174 following Muir (2020). Ratios of stomatal density (SR), stomatal area (AR, calculated from size), and the stomatal cover  
175 ratio ( $f_S R$ ), are calculated as a ratio of the upper leaf surface trait to the total. For example,

$$SR = \frac{D_U}{D_L + D_U} \quad (7)$$

176 Using this formula, a SR is bound by 0 and 1, and a value of 0.5 indicates an equal density of stomata on the upper and lower  
177 leaf surfaces.

## 178 E. QUANTITATIVE GENETIC ANALYSES

179 To investigate how hybridization changes trait distributions and heritable variation, we fitted a series of mixed-effects models  
180 with factors describing different levels of hybridization, fitted a partial-least squares (PLS) model, and estimated heritability.  
181 The hybridization-level models were fit with brms (Bürkner, 2017) using unscaled trait data, and then again to rescaled trait  
182 data with a mean of zero and variance of two-times the standard deviation (*sensu* Gelman, 2008). In total, six sets of models  
183 were fit, substituting a different vector of hybridization level in each model, given by

$$Y_i \sim H_{ijk} + A_i + I_j + \epsilon_i \quad (8)$$

184 where  $Y$  is a trait,  $H$  was a vector of 1) admixture status (i.e. admixed or unadmixed); 2) hybrid set (i.e. BxB, BxT, BxA, or  
185 BxD); or 3) the filial generation (i.e.  $F_1$ ,  $F_2$ , etc.);  $A$  is a matrix of xy garden position coordinates,  $I$  is the random effect of the  
186 individual's genotype,  $\epsilon$  is the error term, and  $i, j, k$  represent the levels of replicate, individual, and the hybridization vector,  
187 respectively. Each model was run using four Markov chains, with 4000 burn-in and 8000 sampling iterations. Model mixing  
188 was improved by setting the `max_treedepth` to 15 and `adapt_delta` to 0.99. For each trait, various relevant distribution models  
189 were fit to the data and the best family chosen using using leave-one-out (LOO) cross validation and posterior predictive checks  
190 (Table S3). A PLS model was fit with the package `mixOmics` (Rohart et al., 2017) using canonical correlation, where the X

191 matrix was a column vector of the expected ancestry proportions, and the  $Y$  matrix was a column vector of traits. Broad-sense  
192 heritability ( $H^2$ ) was estimated separately for unadmixed and admixed data sets using brms. Models were fit with garden  
193 position and genet identity using the same model-run specifications and distribution family selection methodology described  
194 above.  $H^2$  was estimated as,

$$H^2 = \frac{\sigma^2 G}{\sigma^2 G + \sigma^2 \epsilon} \quad (9)$$

195 where  $\sigma^2 G$  represented the variance attributable to genotype and  $\sigma^2 \epsilon$  represented the environmental and error variances.  
196 The posterior median and 90% credible intervals were recorded. The  $RV$  coefficient between the absolute value of the centered  
197 PLS scalar product matrix and the centered heritability matrix was estimated with FactoMineR (Lê et al., 2008) and a p-value  
198 estimated with permutation testing.

199 Covariation of predictors to disease resistance was investigated by fitting four multi-level, multi-response models in brms  
200 with a cumulative family distribution given by

$$R_y \sim X_{ip} + Z_j + A_i + I_j + \epsilon_i \quad (10)$$

201 where  $R_y$  is  $R_1$  or  $R_2$ ,  $X_{ip}$  is a matrix of  $p$  predictors measured from each replicate,  $Z$  is a vector of the expected ancestry  
202 proportion of *P. balsamifera* from each genotype, and  $A$  and  $I$  are defined as above. Some stomatal patterning traits were linear  
203 combinations of  $D$  and  $S$  and were removed, including  $U_U$ ,  $U_L$ ,  $f_{S_L}$ ,  $f_{S_U}$ ,  $g_{s,max_U}$ , and  $g_{s,max_L}$ . Variance from %C and %N were  
204 included in the model as their ratio, CN. The four models differed in their inclusion of stomatal patterning and stomatal ratio  
205 traits (Table S4). Model-run parameters were the same as above, and fitted models were evaluated with LOO cross validation.

206 To investigate the covariance between growth, disease resistance,  $g_{s,max}$ , and how admixture can reveal trade-offs and  
207 selection conflicts, we first estimated marginal BLUPs (mBLUPs) for the three traits, rescaled the data ( $\mu = 0, \sigma^2 = 2 * \sigma$ ),  
208 and fit an interaction model in brms separately for  $R_1$  and  $R_2$ . mBLUPs were fit by modeling the trait as a function of garden  
209 xy coordinates and the random effects of individual, and then adding the intercept to each random effect. The interaction model  
210 was given by

$$G \sim \beta_1 H_i : R_y + \beta_2 H_i : g_{s,max} + \beta_3 H_i : R_y : g_{s,max} + \epsilon_i \quad (11)$$

211 where  $H$  is a vector of factors describing the hybrid set (i.e. BxB, BxT, BxA, or BxD),  $R_y$  is defined as above, and  $\beta_N$  are the  
212 regression coefficients. We used a gaussian distribution family and the model-run parameters previously described. Evidence  
213 for trade-offs between traits was considered present if the product of the slopes was negative; similarly, selection conflicts  
214 were inferred if the product of the slopes from a trade-off were negative (Schluter et al., 1991). Parameter estimates with 95%  
215 credible intervals (CI) that do not overlap zero were considered significant. A path analysis was performed to infer the effect  
216 of  $g_{s,max}$  on growth by summing its independent effects estimated from the regression coefficients, calculated as  $R_{g_{s,max},G} =$



217  $\beta_2 + (\beta_3 * \beta_1)$ .

218 Finally, we further explored the resistance-trait co-variance (Eq. 10) and trade-off models (Eq. 11) by fitting a model to  
219 rescaled data to search for contrasting growth-defense trait syndromes that are mediated by selection for different values of  
220  $g_{s,max}$  or  $D_U$ , given by

$$G \sim R_1 + g_{s,max} + g_{s,max} : R_1 + g_{s,max} : D_U + A + Z + I + \epsilon_i \quad (12)$$

221 where abbreviations are given in Table 1 and model parameters the same as above. We chose to fit the model to  $R_1$ , as there  
222 were stronger support for trade-offs than in  $R_2$ .

### 223 III. RESULTS

#### 224 A. TRAIT DISTRIBUTIONS AND HYBRIDIZATION EFFECTS

225 Extensive hybridization and backcrossing was revealed from the NewHybrids analyses (Fig 1e, Table 2, Tables S2a, S2b, S2c).  
226 Our sample collection protocol was designed to target non-hybrid genotypes, thus the distribution of hybrids in our sample is  
227 less than what is expected on the landscape. Nevertheless, we observed hybrids with *P. deltoides* at the  $F_1$  generation, with *P.*  
228 *angustifolia* at the  $F_1$  and  $F_2$  generations, and with *P. trichocarpa* at advanced stages of backcrossing into *P. balsamifera*.

229 Disease resistance was measured during two years and showed a left skewed distribution with the majority of genotypes  
230 resistant to *M. medusae* in both  $R_1$  (55%) and  $R_2$  (80%) (Fig. S1). Zero-inflated distributions were observed for upper leaf  
231 surface stomatal patterning and ratio traits, while stomatal patterning of the lower leaf surface traits were gaussian distributed.  
232 AR was zero-inflated and the non-zero values in the tail had a median of 0.43 with a minimum value of 0.29 and a maximum  
233 of 0.54. Similarly, SR was zero-inflated and the tail had a median of 0.18 with a minimum of 0.05 and a maximum of 0.44.  
234 Admixed genotypes, along with 43 of 315 unadmixed BxB individuals, had positive stomatal ratio values. Ecophysiology traits  
235 were generally gaussian distributed. We observed high co-variance of stomatal patterning traits to eachother, as well as moderate  
236 to high correlations between resistance and ecophysiology traits (Fig. S2).

237 Hybridization had a considerable effect on the distribution of trait values (Eq 8) measured at the level admixture status (Fig.  
238 S3), hybrid set (Fig. S4), and filial generation (Fig. S5). Distribution families for unscaled and rescaled data were typically  
239 the same for a given trait, but varied considerably across traits (Table S3). Admixture status influences resistance in both  
240 years. Unadmixed genotypes have the highest probability of exhibiting complete resistance in both  $R_1$  ( $P = 0.79$ ) and  $R_2$  ( $P$   
241  $= 0.97$ ), while for admixed genotypes, the lowest resistance score had the highest probability in  $R_1$  ( $P = 0.34$ , Fig. S3). In  
242 2016, admixed genotypes exhibited increasing probability of resistance from 1 (least resistance) to 5 (completely resistance)  
243 (Fig. S3). By rescaling and centering traits before fitting models, we can plot the conditional effects of hybridization jointly and  
244 observe shifts in integrated sets of traits. Viewing hybridization at its most fundamental level, whether a genotype is admixed or  
245 not, we observed a coordinated increase of upper stomatal patterning traits, a decrease in disease resistance and growth, while  
246 ecophysiology traits remained largely unchanged (Fig. S6a). When considering different sets of hybrids the deviation of the  
247 conditional effects from zero increased from unadmixed BxB genotypes to BxD hybrids (Fig. 2a). Upper stomatal patterning

248 traits diverged first in BxT hybrids and remained elevated in BxA hybrids, but some decreased in BxD hybrids, including  
249  $D_U$ . In BxB, BxT, and BxA hybrids  $S_L$ ,  $f_{S_L}$  and  $f_S$  remained at similar values and increased in BxD hybrids.  $D_L$  is highest  
250 in BxB and decreased in each subsequent hybrid set. Resistance decreased with increasing phylogenetic distance of the non-  
251 *balsamifera* parent. Growth decreased in BxT and BxA hybrids relative to BxB, and was elevated in BxD genotypes, of which  
252 all are  $F_1$  generation hybrids (Fig. 2b).  $\Delta^{13}C$ , frequently interpreted as a measure of WUE, was elevated for BxA hybrids,  
253 indicating decreased WUE in these hybrids. The remaining ecophysiology traits remain largely unchanged between hybrid sets  
254 (Figs. 2a, S4). Although we had limited ability to estimate variance components for parameters in the filial generations of  $F_2$   
255 ( $N=3$ ) and  $P1.F_1$  ( $N=2$ ), we can generally report that trait variation was largest at the  $F_2$  and  $F_1$  generations, and remains high  
256 until the  $P1.P1F_1$  generation, and is lowest in the unadmixed *P. balsamifera* (Fig. S6b). Resistance to *M. medusae* was highest  
257 in unadmixed genotypes,  $P1.P1F_2$ , and  $P1.P1F_1$  filial generations. After  $P1.F_2$ , genotypes had decreased resistance. Stomatal  
258 patterning traits were generally lower in the unadmixed filial generation, and increased in value and in variance in subsequent  
259 filial generations. After the  $P1.F_2$  generation,  $SR$ ,  $AR$ ,  $f_{SR}$ ,  $D_U$ ,  $f_S$ ,  $f_{S_U}$ , became elevated and remained so.

260  $H^2$  estimates ranged widely from 0.01 to 0.8 (Fig. 3a).  $H^2$  increased from 0.38 to 0.45 as a result of admixture (t-test:  $t =$   
261 1.0815,  $df = 47.62$ ,  $p\text{-value} = 0.2849$ ,  $N = 50$ , 25 per set). For both the admixed (red) and unadmixed (black) data sets, the upper  
262 stomatal traits had a mean  $H^2$  estimate of 0.59, the lower stomatal traits 0.52, and the stomatal ratio traits had a mean of 0.56.  
263 In both years,  $H^2$  estimates for disease resistance were higher in the admixed data set and lower in the unadmixed. Including  $G$ ,  
264 the ecophysiology traits had a mean  $H^2$  of 0.2. PLS analyses were conducted to investigate the effect of changes in the expected  
265 ancestry proportion from each species on the traits. The scalar product between pairs of vectors in the  $X$  and  $Y$  matrices indicate  
266 the degree of correlation between variables. Using hierarchical clustering of the scalar products, we observed four blocks of  
267 traits containing: resistance,  $D_L$ ,  $g_{s,max_L}$ , and %C (block 1); ecophysiology traits, growth, and  $U_U$  (block 2);  $S_L$   $U_L$ ,  $f_{S_L}$  and  
268  $f_S$  (block 3); and  $g_{s,max}$ ,  $SR$ ,  $AR$ ,  $f_{SR}$ , and the upper stomatal patterning traits (block 4). Block 3 and 4 contained, in general,  
269 the stomatal traits, with some lower stomatal traits clustering into block 3 and the ratio and upper stomatal traits in block 4.  
270 Overall the scalar products were positively correlated to increasing *P. balsamifera* ancestry in block 1 and negatively correlated  
271 in block 4. Block 2 has scalar products that were neither positive nor strongly negative, while block 3 is largely characterized by  
272 positive correlation to *P. deltoides* ancestry (Fig. 3b). The correlation of the absolute value of the mean-centered scalar products  
273 to  $H^2$  was moderate ( $RV = 0.35$ ,  $p\text{-value} < 0.01$ ).

## 274 B. MULTI-RESPONSE REGRESSION OF DISEASE RESISTANCE

275 A multi-response model was fit simultaneously for  $R_1$  and  $R_2$  to a subset of the stomatal patterning, growth, ecophysiology,  
276 and ancestry data (Eq. 10, Fig. 4). The model was fit on data collected at the replicate level, allowing us to include experimental  
277 design effects, and to account for individual-level variation with a random effect of genotype. We used the difference of the  
278 expected log point-wise predictive density ( $\Delta ELPD$ ) to rank models, and the model which included upper and lower  $D$  and  $S$   
279 variables separately, but excluded  $f_{SR}$  was favored (Table S4). The proportion of *P. balsamifera* ancestry explained the most  
280 variance in the model and was positively correlated to the disease resistance responses (regression coefficients:  $R_1 = 15.6$ ;  $R_2$

281 = 39.9). In  $R_1$  at the 95% CI,  $D_U$ , AR,  $G$ ,  $\Delta^{13}\text{C}$  were negatively correlated, while CN was positively correlated. At the 66%  
282 CI,  $f_S$  and CCI were negatively correlated, while  $g_{s,\text{max}}$  and SR were positively correlated. In  $R_2$  at the 95% CI,  $D_L$ ,  $S_U$ ,  $\delta^{15}\text{N}$   
283 were negatively correlated, while CN was positively correlated. At the 66% CI,  $S_L$  SLA, and CCI were negatively correlated,  
284 while  $f_S$ ,  $g_{s,\text{max}}$  were positively correlated (Fig. 4A).

285 Through plotting interactions of traits against  $R_1$  and  $R_2$ , we explored the effect of a third trait while controlling for an  
286 independent variable (Fig. 4B). After accounting for the negative correlation between  $D_U$ , increasing AR (i.e. shifting stomatal  
287 area to the upper surface) decreases resistance for genotypes with low  $D_U$ . At a given level of  $D_L$ , increasing  $S_L$  decreases  
288 resistance.  $f_S$  is negatively correlated with  $R_1$ , and increasing  $g_{s,\text{max}}$  at a given level of  $f_S$  increases resistance. In  $R_2$ ,  $S_U$  is  
289 negatively correlated with resistance at high values, but resistance is lost even faster when the density of stomata on the upper  
290 surface increases. A similar pattern is observed on the lower leaf surface. Finally, increases in the proportion of *P. balsamifera*  
291 ancestry ameliorated the negative effects of increases in  $D_L$ .

### 292 C. SELECTION TRADE-OFFS, CONFLICTS, AND GROWTH-STRATEGIES

293 To determine if there was evidence for evolutionary trade-offs in unadmixed and hybrid populations, and if trade-offs were  
294 revealed in some hybrid sets but not others, multiple regression models with two-way and three-way interaction terms were fit  
295 (Eq. 11). A significant trade-off between  $R_1$  and  $G$  was observed in BxB, BxT, and BxD hybrid sets, but not in BxA hybrids,  
296 which had a positive correlation (Table 3). Increasing values of  $g_{s,\text{max}}$  had a significant trade-off to  $G$  in BxT hybrids, but a  
297 significant positive effect in BxD hybrids. In BxB genotypes, increasing  $g_{s,\text{max}}$  had a significant positive effect on  $G$  through  
298 its independent effects on  $R_1$ , as observed in the three-way interaction ( $\beta_3$ ). Fewer interaction terms were significant in the  
299 regressions using  $R_2$ , but a significant trade-off between  $G$  and  $R_2$  was observed in BxD hybrids, and the slope was reversed  
300 in BxA hybrids.

301 None of the selection conflicts between resistance and  $G$  or  $g_{s,\text{max}}$  and  $G$  were statistically significant; nevertheless, selection  
302 conflicts were observed for BxB, BxA, and BxD hybrid sets in  $R_1$ , and for BxT and BxA sets in  $R_2$ . The path analysis  
303 investigated the cumulative effect of  $g_{s,\text{max}}$  on  $G$  through two independent pathways. Path analysis results varied by year and  
304 by hybrid set. In  $R_1$ , the path analysis yielded a significant negative result for BxT, and non-significant negative results for BxB  
305 and BxA hybrid sets. In  $R_2$ , none of the paths were significant, but the sign of the path reversed in BxB and BxD hybrid sets  
306 (Table 3).

307 Finally, we explored the data for the presence of contrasting growth-resistance strategies, possibly fine-tuned by variation  
308 of  $g_{s,\text{max}}$  and  $D_U$  (Eq 12). We only explored variation of  $R_1$ , as the relationships between traits were stronger in the 2015  
309 data (Table 3). We again recovered the negative relationship between resistance and growth (regression coefficient = -0.59,  
310 significant at 95% CI, Fig 5a). BxB genotypes anchored the low-growth/high-resistance growth strategy and BxT genotypes  
311 were intermediate to BxA and BxD genotypes which had less resistance. The growth of non-*P. balsamifera* accessions is  
312 possibly impacted by the disease, which could account for growth that is substantially less than the predicted values from the  
313 model. Overall,  $g_{s,\text{max}}$  had a positive slope with  $G$  (regression coefficient = 0.13, significant at 95% CI), and two contrasting

314 strategies for  $g_{s,max}$  were observed which were fine tuned by  $D_U$  ( $g_{s,max} : D_U$  regression coefficient = 0.24, significant at  
315 95% CI). The negative effects of high resistance on  $G$  can be ameliorated by decreasing  $g_{s,max}$  ( $R_1 : g_{s,max}$  coefficient = -0.1  
316 significant at 66% CI). At high values of  $g_{s,max}$ , growth can be increased with higher values of  $D_U$ ; while at low values of  
317  $g_{s,max}$ , higher growth is achieved with lower values of  $D_U$ . The low  $g_{s,max}$ - $D_U$  growth strategy is occupied by BxB genotypes  
318 and BxD hybrids, while BxA and BxT hybrids occupy the alternative strategy (Fig. 5b).

#### 319 IV. DISCUSSION

320 We conducted a quantitative genetic study in a set of *Populus* hybrids segregating for variation of disease resistance, stomatal  
321 patterning, and ecophysiological traits. Our motivations were to understand how hybridization changes trait distributions and  
322 heritable variation, and to identify correlations between stomatal and ecophysiology traits to disease resistance. We were  
323 particularly interested in identifying potential trade-offs and selection conflicts between pairs of traits that were masked in  
324 unadmixed populations but visible in hybrids. Our final motivation was to determine if we could identify competing growth  
325 strategies present in hybrid genotypes informing us about the evolution of growth strategies in natural hybrid zones, and  
326 potentially growth strategy evolution in each parental species. Our results clearly indicate hybridization, which we documented  
327 at three levels, has an important influence on trait values and the magnitude of their variances. Upper stomatal and ratio traits  
328 were correlated to variation of disease resistance, and we observed negative correlations between  $D_U$  and AR to resistance.  
329 After accounting for the effect of  $D_U$  variation (and all other predictors in the multi-response model), shifting stomatal area to  
330 the upper surface (i.e. increasing AR) or increasing the size of stomata on the upper surface decreased resistance. We observed  
331 a negative relationship between stomatal cover ( $f_S$ ) and resistance, and after accounting for  $f_S$ , increasing  $g_{s,max}$  increases  
332 resistance. Trade-offs between  $g_{s,max}$  and  $G$  masked in the BxB set were made visible through hybridization in other sets.  
333 Likewise, the trade-off between  $G$  and  $R_1$  reversed sign in one hybrid set that was negative in the unadmixed *P. balsamifera*  
334 set. It is clear that hybridization is a useful tool for revealing trade-offs and studying the integration of sets of traits. We  
335 observed contrasting growth strategies along the growth-defense spectrum that were finely tuned by variation of  $g_{s,max}$  and  
336  $D_U$ . Indirectly, our results suggest selection is likely able to efficiently act on traits with high heritability and also correlated  
337 to disease resistance. Furthermore, the expression of trade-offs is dependent on the genetic background and environmental  
338 context. Finally, these results suggest the evolution of competing growth-defense strategies and their mis-alignment in hybrid  
339 zones may reinforce species boundaries, and that maladaptive genotypic variation observed in hybrids may have a phylogenetic  
340 context.

341 A question raised by these results is whether selection acting in these hybrid populations could sufficiently purge maladaptive  
342 genotypic variation linked to disease susceptibility? Our results suggest the answer is yes, resistance could be increased from  
343 selection for traits highly correlated to disease resistance, which, additionally, had large absolute value of scalar products to  
344 the proportion of *P. balsamifera* ancestry. Many of the traits with high absolute scalar product values also had high broad-  
345 sense heritabilities. For example,  $D_U$  and AR are two traits significantly correlated to disease resistance (regression coefficient  
346 = -9.67, -7.26, respectively) with large scalar products to *P. balsamifera* ancestry (PLS scalar product = -0.529, -0.524,

347 respectively) and moderately high broad-sense heritability ( $H^2 = 0.73, 0.4$ , respectively). If selection for increased disease  
348 resistance were to occur that targeted  $D_U$ , AR, or traits with high co-variances to those two traits, populations similar to the  
349 ones we describe are likely to leave descendants with increased resistance. Similarly, any of the stomatal traits in the PLS  
350 blocks 1, 3, or 4 (Fig. 3) are likely good candidates to respond to selection for increased resistance.

351 The presence of amphistomy (having stomata on both leaf surfaces) as a result of hybridization raises interesting evolutionary  
352 consequences. Theoretical models of the benefits and costs of stomatal distributions indicate the increased efficiency of  
353 photosynthesis under amphistomy should lead to more species organizing their stomata on both surfaces (Muir, 2015). Yet,  
354 hypostomy (stomata only on the lower surface) predominates, particularly in trees and shrubs. Models which incorporate costs  
355 of amphistomy indicate a narrow range of optima, with few intermediate values of stomatal ratio, should predominate (Muir,  
356 2015). The results from this study support theoretical conclusions that the costs of amphistomy are sufficiently high to constrain  
357 the available trait space in which plants evolve, particularly when pathogen pressure is high. While amphistomy is rare in *P.*  
358 *balsamifera*, it is common in *P. trichocarpa*, where northern populations have evolved increased stomatal ratio, possibly as a  
359 response to fine-tuning the growth-defense trade-off (McKown et al., 2014; McKown et al., 2019). We observed stomata on  
360 the upper leaf surfaces of *P. angustifolia* hybrids, possibly indicating selection for locally adapted stomatal phenotypes in the  
361 parental species' populations. Further simulation work by Muir concludes that greater stomatal size or density increases the  
362 probability of pathogen colonization, and the effect is most pronounced when the fraction of leaf surface covered by stomata  
363 is low. Our results support Muir's conclusions, as we demonstrate a pronounced decrease in resistance when stomatal densities  
364 are low and stomatal size is shifted to the upper leaf surface (Fig. 4b).

365 Evolution of growth strategies within species has been documented in other taxa and theory around growth-strategy evolution  
366 was important in early work that conceptually defined trade-offs (Schluter et al., 1991). Given sufficient selection from  
367 pathogens and heritable variation, plant species are likely to evolve a growth-defense optimum maximizing their fitness based  
368 on the likelihood of pathogen exposure, physiological severity of the disease, and the cost of mounting a defense (Obeso,  
369 2002). The growth-defense optimum can be locally adapted, and even change between populations within a species (e.g. *P.*  
370 *trichocarpa*, McKown et al., 2014). When hybrids are formed, misaligned growth-defense strategies and the breakdown of  
371 phenotypic integration can negatively impact fitness through outbreeding depression (Goldberg et al., 2005), perhaps even in  
372 the presence of heterosis, as suggested by the decreased resistance in  $F_1$  BxD hybrids. These data may indirectly inform us  
373 about the evolution of growth strategies in hybrid zones or of the parental species themselves. Our data suggest *P. angustifolia*  
374 hybrids possess a fast-growing/low defense growth strategy, paired with higher  $g_{s,max}$  and  $D_U$  (Fig. 5), consistent with other  
375 reports from this species (e.g. Kaluthota et al., 2015). The observed growth rate of BxA hybrids is well below the predicted  
376 growth rate of the model, possibly as a result of the increased infection by *Melampsora* reducing growth. We may expect the  
377 observed growth rate of BxA hybrids to be closer to its prediction in an environment free of disease. *P. trichocarpa* hybrids  
378 are shifted along the spectrum, and have lower growth and higher resistance, paired with high  $g_{s,max}$  and higher  $D_U$ , also  
379 consistent with reports from this species (e.g. McKown et al., 2014; McKown et al., 2019). *P. balsamifera* genotypes appear  
380 to have evolved towards the lower growth/higher defense strategy and have lower  $g_{s,max}$  and almost a complete lack of upper

381 stomata. Hybrids with *P. deltoides* were all  $F_1$ 's and our interpretation of these results is likely biased by heterosis, although  
382 they appear to have evolved towards the fast growth/low defense end of the spectrum and all BxD hybrids bear stomata on the  
383 upper leaf surface. Inferring growth strategies for parental species from hybrids is difficult. An experiment growing unadmixed  
384 genotypes of each species collected from their core ranges in a common environment would yield results free from the effects  
385 of admixture

386 Our results indicate an important role for resistance,  $g_{s,max}$  and  $D_U$  in fine tuning growth strategies. Our models predict  
387 that genotypes at the slow-growth/high-resistance end of the spectrum can increase their growth by decreasing  $g_{s,max}$ , possibly  
388 suggesting that disease susceptibility is more costly to growth than a reduction in gas exchange (Fig. 5a). Growth can be fine-  
389 tuned by variation of  $g_{s,max}$  and  $D_U$ , where optimal growth can be achieved with low  $g_{s,max}$  and  $D_U$  values, or, in contrast,  
390 high values of  $g_{s,max}$  and  $D_U$  (Fig. 5b). The interaction of  $D_U$  and  $g_{s,max}$  to increase growth at high values demonstrates a  
391 potential benefit to carrying stomata on the upper leaf surface, despite the higher risk of disease.

392 Hybridization appears to be an effective tool for disrupting phenotypic integration and introducing genotypic variance into a  
393 population. The conditional effects analyses on the centered and rescaled data demonstrated well how variance is introduced into  
394 a breeding population. In each of the three levels of hybridization we investigated, variance decreased towards the unadmixed  
395 population. It seems likely in populations similar to ours that selection would act at the larger scale of dozens of Mb to large  
396 portions of chromosomes, rather than soft selective sweeps acting on individual genes or causal variants. Although linkage  
397 decays rapidly in wind-pollinated, out-crossing species such as poplars (Tuskan et al., 2006), and adaptive introgression has  
398 been documented in these taxa before (e.g. Suarez-Gonzalez et al., 2018; Chhatre et al., 2018), the overwhelming fate of the  
399 non-*P. balsamifera* genetic material is mostly likely extirpation, even under mildly negative or purifying selection.

400 The magnitude of trade-offs and selection conflicts are not constant within our populations and are dependent on the genetic  
401 background, the environment, and the magnitude of genotype by environment (GxE). Trade-offs and selection conflicts may  
402 generally be subject to these interactions and visible in some circumstances, but not others. Although the data we present give  
403 us scant opportunity to determine the role of plasticity in revealing trade-offs and conflicts, the resistance data was measured  
404 in two years. We observed different estimates of  $H^2$  values and their variances between years, and the sizes of trade-offs were  
405 different within hybrid sets. A reversal of the growth-resistance trade-off was observed in the BxT hybrids. While the selection  
406 conflicts we observed were not significant, they reversed sign and magnitude between  $R_1$  and  $R_2$ . These data indirectly support  
407 the idea that plasticity has an important evolutionary role for revealing or masking trade-offs and selection conflicts. Meta-  
408 analyses of plasticity have found adaptive plasticity to be less common than non-plastic modes of adaptation (Palacio-López  
409 et al., 2015), but the role of adaptive plasticity in maintaining fitness in a hybrid zones is less understood.

410 Collecting hybrids from crosses between multiple species within *Populus* allows us to indirectly infer the effect of  
411 phylogenetic distance of the parental species on trait variance, evolutionary, and ecological effects. We observed decreasing  
412 resistance with increasing phylogenetic distance of the non-*balsamifera* parent after accounting for hybrid set (Fig. 2b).  
413 Resistance was restored with backcrossing into *P. balsamifera* advanced generation hybrids (Fig. S5). Increased disease in  
414 hybrid populations has been speculated to be an important ecological and evolutionary factor in maintaining species barriers

415 (Bever et al., 2015). The increased disease we observed may be a common feature of hybrid zones, and indeed, hybrid zones  
416 may even provide refuge for pathogens and pests (Whitham, 1989). An example from a tri-hybrid zone in Alberta, Canada  
417 documents naturally formed F<sub>1</sub> *P. balsamifera* x *angustifolia* hybrids transgressively segregating for the number of galls per  
418 tree and back-crosses into *P. balsamifera* were even more susceptible to gall forming pests and had higher resistance variance  
419 than F<sub>1</sub> or unadmixed parental genotypes (Floate et al., 2016). These trends suggest an important role for pathogen associated  
420 selection in maintaining species barriers in *Populus*.

## 421 V. CONCLUSIONS

422 We investigated the effects of hybridization on disease resistance and correlated stomatal and ecophysiological traits. We  
423 have demonstrated the effects of hybridization on trait variance at multiple scales, and shown how hybridization can reveal  
424 trade-offs and potential selection conflicts when integrated modules of traits, likely adapted in either parental species, are  
425 combined in admixed populations. Misalignment of growth-defense strategies results in decreased disease resistance and  
426 maladaptive phenotypic distributions. We are able to better understand how pathogen-associated selection can constrain stomatal  
427 trait distributions in admixed populations. These results demonstrate the important evolutionary and ecological effects of  
428 hybridization in plant-pathogen interactions. Future research in this system will focus on using admixture mapping to identify  
429 genomic regions which underlie the disease resistance observed in *P. balsamifera* and *P. trichocarpa*. Understanding the core  
430 growth-defense strategies that have evolved in each species will allow ecologists to place their findings of disease ecology in  
431 hybrid zones into a wider context, and should be undertaken by future researchers.

## 432 VI. DATA ACCESSIBILITY

433 Cuticle micrographs are deposited on Dryad (doi:10.5061/dryad.kh2gv5f). Raw sequence reads are available on NCBI SRA  
434 (accession # SRP070954). NewHybrids filial call probabilities are provided in Supplementary Information S4a-c. Data used for  
435 this study are provided in the appendix 2.

436 VII. TABLES

Table 1: Trait definitions, abbreviations, and units.

| Definition                                    | Abbvr.                | Units                            |
|-----------------------------------------------|-----------------------|----------------------------------|
| Disease                                       |                       |                                  |
| Disease Resistance 2015                       | $R_1$                 | ordinal                          |
| Disease Resistance 2016                       | $R_2$                 | ordinal                          |
| Stomatal patterning                           |                       |                                  |
| Upper stomatal density                        | $D_U$                 | $\text{mm}^{-2}$                 |
| Lower stomatal density                        | $D_L$                 | $\text{mm}^{-2}$                 |
| Upper stomatal size                           | $S_U$                 | $\mu\text{m}^2$                  |
| Lower stomatal size                           | $S_L$                 | $\mu\text{m}^2$                  |
| Lower stomatal cover                          | $f_{S_U}$             | none                             |
| Upper stomatal cover                          | $f_{S_L}$             | none                             |
| Total stomatal cover                          | $f_S$                 | none                             |
| Upper interstomatal distance                  | $U_U$                 | $\mu\text{m}$                    |
| Lower interstomatal distance                  | $U_L$                 | $\mu\text{m}$                    |
| Upper anatomical maximum stomatal conductance | $g_{s,\text{max}_U}$  | $\text{mol m}^{-2}\text{s}^{-1}$ |
| Lower anatomical maximum stomatal conductance | $g_{s,\text{max}_L}$  | $\text{mol m}^{-2}\text{s}^{-1}$ |
| Total anatomical maximum stomatal conductance | $g_{s,\text{max}}$    | $\text{mol m}^{-2}\text{s}^{-1}$ |
| Stomatal density ratio                        | SR                    | none                             |
| Stomatal area ratio                           | AR                    | none                             |
| Stomatal cover ratio                          | $f_{SR}$              | none                             |
| Ecophysiology                                 |                       |                                  |
| Relative growth rate                          | $G$                   | cm                               |
| Carbon:Nitrogen                               | CN                    | none                             |
| Leaf percent carbon                           | %C                    | %                                |
| Leaf percent nitrogen                         | %N                    | %                                |
| Carbon isotope discrimination                 | $\Delta^{13}\text{C}$ | ‰                                |
| Nitrogen isotope value                        | $\delta^{15}\text{N}$ | ‰                                |
| Specific leaf area                            | SLA                   | $\text{mm}^2 \text{mg}^{-1}$     |
| Chlorophyll content index                     | CCI                   | none                             |

Table 2: Sample sizes of reference populations from which segregating loci were selected and NewHybrids estimates for the number of genotypes within each filial generation.

| Hybrid set                                  | Ref. $P_x$ (0) | Ref. $P_b$ (1) | $P_b$ | $F_1$ | $F_2$ | $P_0.F_1$ | $P_1.F_1$ | $P_0.F_2$ | $P_1.F_2$ | $P_0.P_0F_1$ | $P_1.P_1F_1$ | $P_0.P_0F_2$ | $P_1.P_1F_2$ |
|---------------------------------------------|----------------|----------------|-------|-------|-------|-----------|-----------|-----------|-----------|--------------|--------------|--------------|--------------|
| <i>P. balsamifera</i> x <i>trichocarpa</i>  | 46             | 38             | 407   | -     | -     | -         | 2         | -         | 32        | -            | 15           | -            | 35           |
| <i>P. balsamifera</i> x <i>angustifolia</i> | 37             | 114            | 216   | 13    | 3     | -         | -         | -         | -         | -            | -            | -            | -            |
| <i>P. balsamifera</i> x <i>deltoides</i>    | 32             | 38             | 369   | 15    | -     | -         | -         | -         | -         | -            | -            | -            | -            |

Ref.  $P_x$  (0), non-*Populus balsamifera* reference parental species; Ref.  $P_b$  (1), *P. balsamifera* reference;  $P_b$ , *P. balsamifera*



Table 3: Trade-offs, selection conflicts, and path analysis ( $R_{g_{s,max},G}$ ) of the effects of theoretical maximum stomatal conductance ( $g_{s,max}$ ) and disease resistance ( $R_y$ ) on growth ( $G$ ). Coefficients were estimated with hybrid set ( $H$ ) as an interaction term (Eq. 11). Negative regression coefficients or their products indicate trade-offs or selection conflicts, respectively. The path analysis sums each independent path of the effect of  $g_{s,max}$  on  $G$ , as indicated by the path diagram. Parameter estimates that do not overlap zero at a 95 % CI indicated by bold.

| $R_1$      |                     |                           |                                     |                          |                   |
|------------|---------------------|---------------------------|-------------------------------------|--------------------------|-------------------|
| Hybrid set | $H : R_1 (\beta_1)$ | $H : g_{s,max} (\beta_2)$ | $H : g_{s,max} \cdot R_1 (\beta_3)$ | $\beta_1 \times \beta_2$ | $R_{g_{s,max},G}$ |
| BxB        | <b>-0.76</b>        | 0.03                      | <b>0.17</b>                         | -0.03                    | -0.22             |
| BxT        | <b>-0.28</b>        | <b>-0.35</b>              | 0.18                                | 0.08                     | <b>-0.4</b>       |
| BxA        | <b>0.71</b>         | -0.12                     | -0.57                               | -0.07                    | -0.53             |
| BxD        | <b>-0.21</b>        | <b>0.55</b>               | -0.03                               | -0.04                    | 0.55              |

  

| $R_2$      |                     |                           |                                     |                          |                   |
|------------|---------------------|---------------------------|-------------------------------------|--------------------------|-------------------|
| Hybrid set | $H : R_2 (\beta_1)$ | $H : g_{s,max} (\beta_2)$ | $H : g_{s,max} \cdot R_2 (\beta_3)$ | $\beta_1 \times \beta_2$ | $R_{g_{s,max},G}$ |
| BxB        | -0.06               | 0.09                      | -0.02                               | 0                        | 0.09              |
| BxT        | 0.2                 | -0.29                     | -0.18                               | -0.04                    | -0.36             |
| BxA        | <b>0.5</b>          | -0.15                     | -0.4                                | -0.05                    | -0.41             |
| BxD        | <b>-0.3</b>         | -1.3                      | -1.6                                | 0.27                     | -0.75             |

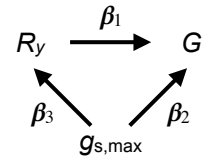

437 VIII. FIGURES

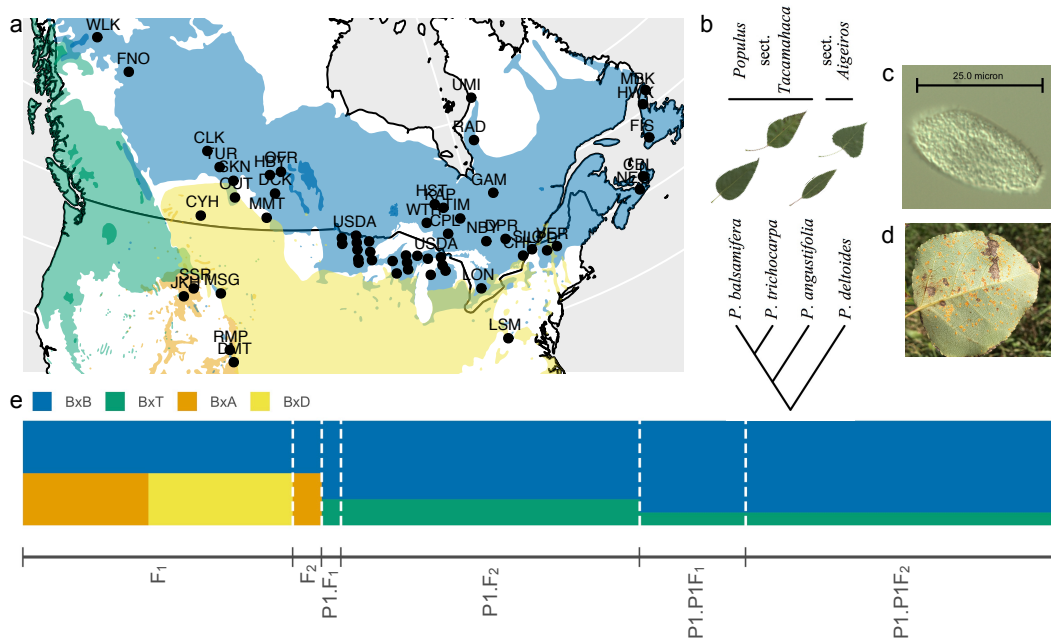

Figure 1: Sample locality map and geographic ranges of four species of poplar: *P. balsamifera* (blue), *P. trichocarpa* (green), *P. angustifolia* (orange), and *P. deltoides* (yellow) (a). See Table S1 for population coordinates and samples sizes. Phylogenetic relationships of the four parental species presented as a cladogram (taxonomy from Eckenwalder, 1996). Representative leaves of each set of poplars from the common garden (b). Uredospore (c) and disease sign (d) of *Melampsora medusae* on the leaf of an *P. balsamifera* x *deltoides* hybrid. The expected proportion of ancestry of hybrid genotypes was calculated from NewHybrid (Anderson and Thompson, 2002) estimates of filial generation (e).

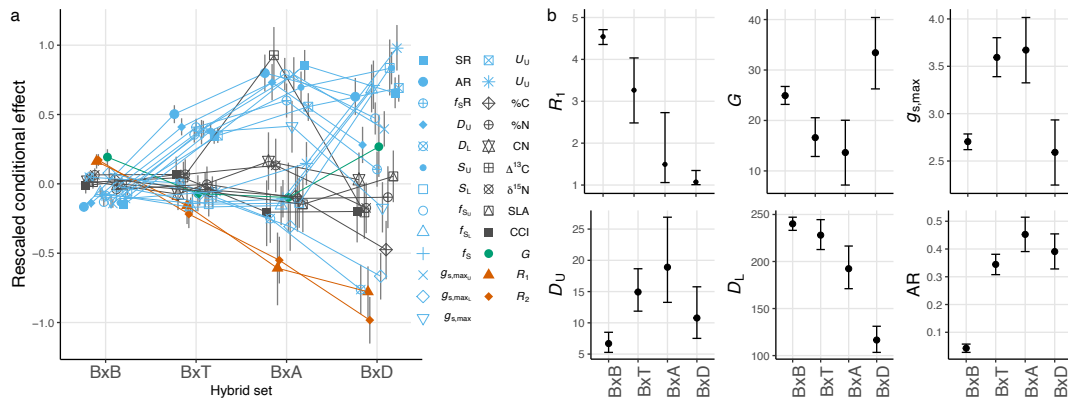

Figure 2: Point estimates and 95% credible intervals for the conditional effects of hybridization on trait values. Rescaled and centered trait data (a) and unscaled data (b) were analyzed with mixed-effects models to observe the effects of hybrid set (Eq. 8). See Table 1 for trait abbreviations and Table S3 for distribution families of each model.

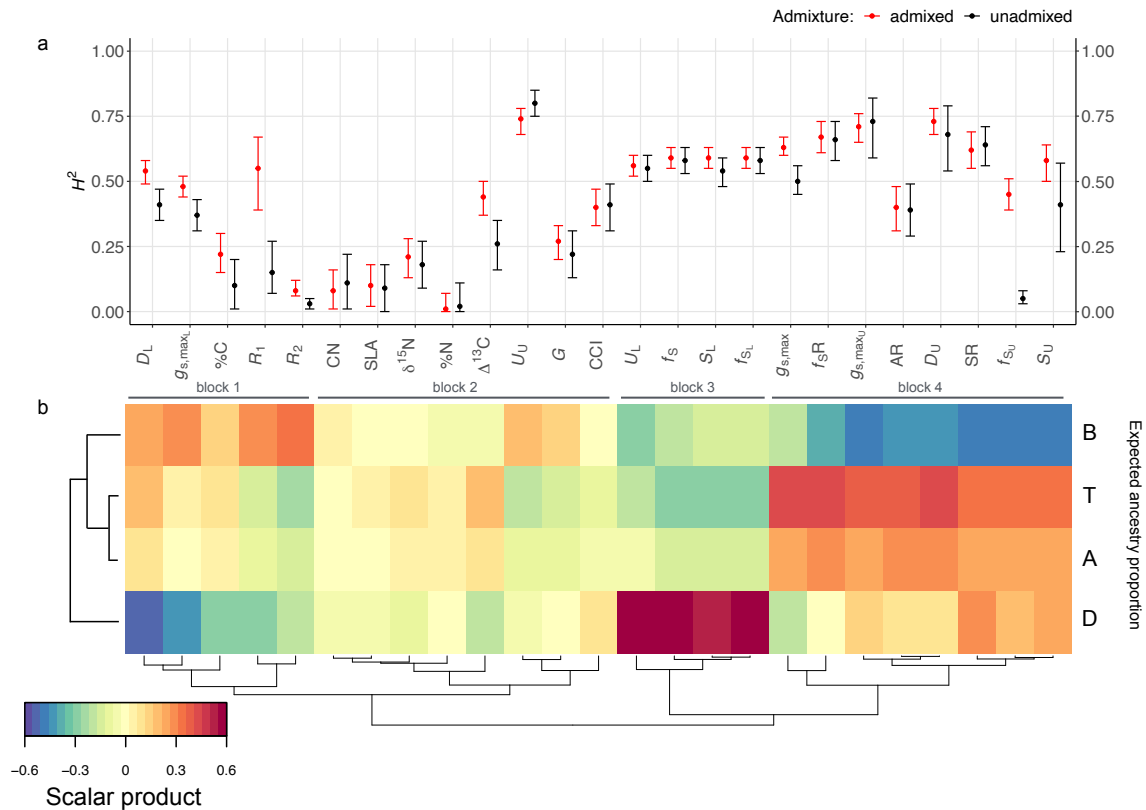

Figure 3: Median broad-sense heritability ( $H^2$ ) and 90% credible intervals estimated from data sets containing both admixed and unadmixed samples (red) or only unadmixed samples (black) (a). Partial least squares (PLS) regression of ancestry proportions (X matrix) and traits (Y matrix) (b). B, T, A, and D represent vectors of the expected ancestry proportions for each individual estimated by NewHybrids (Table 2). Correlations between pairs of traits are indicated by the color ramp, which represents the product of variable loading vectors  $U'$  and  $V'$  from the X and Y matrices, respectively. The  $R_V$  coefficient between the scalar product and  $H^2$  matrices is 0.35 (p-value < 0.01). See Table S2 for  $H^2$  estimates.

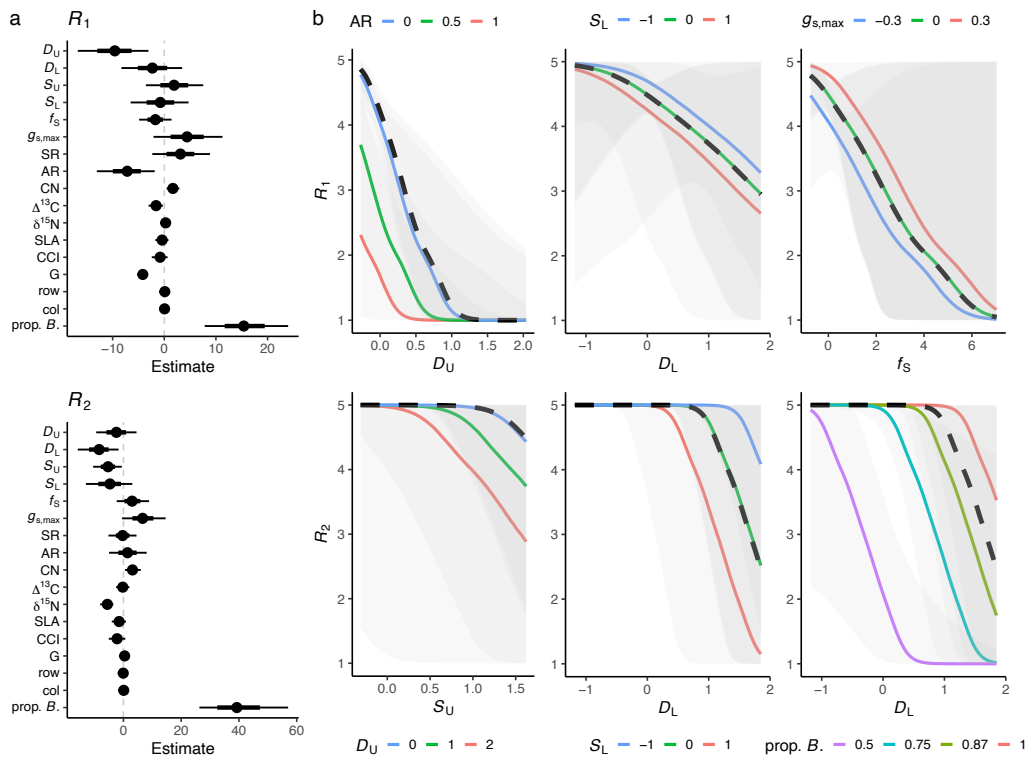

Figure 4: Multiple regression of stomatal patterning and ecophysiology traits on disease resistance within a Bayesian multi-response model (Eq. 10). Median regression coefficient estimates and their 66% and 95% quantile credible intervals (a). Predicted conditional effect of the independent variable (dashed line) and interactions terms (solid lines) are given in the right panels (b).

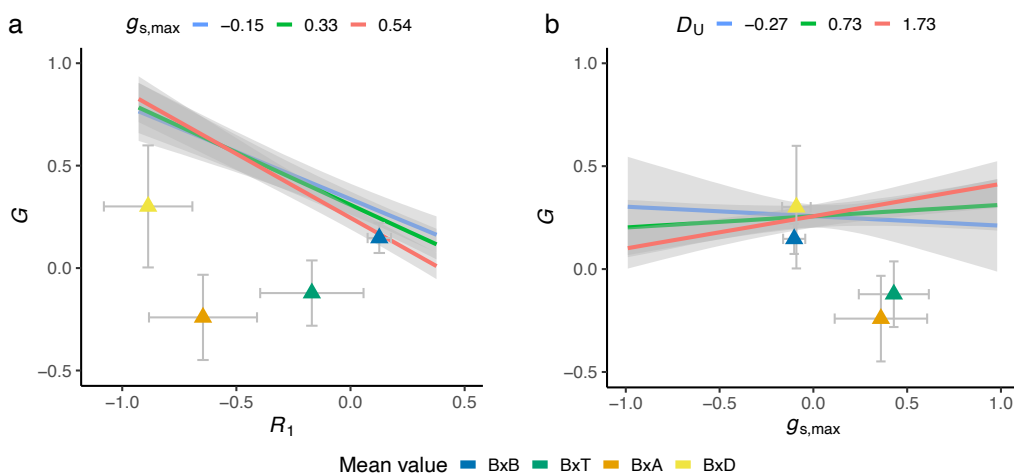

Figure 5: Contrasting growth-resistance and growth-gas exchange strategies are revealed between hybrid sets (model output from Eq. 12). The effects of resistance on growth are dependent on its interaction with  $g_{s,max}$  (a). Likewise, the effects of  $g_{s,max}$  on growth are dependent on its interaction with upper stomatal density ( $D_U$ ) (b). Mean BLUP value of hybrid sets and their 95% confidence intervals are plotted as triangles.

## 438 IX. REFERENCES

- 439 Allen, E, B Hazen, H Hoch, Y Kwon, G Leinhos, R Staples, M Stumpf, B Terhune, et al. (1991). “Appressorium formation in  
440 response to topographical signals by 27 rust species.” In: *Phytopathology* 81.3, pp. 323–331.
- 441 Anderson, E and E Thompson (2002). “A model-based method for identifying species hybrids using multilocus genetic data”.  
442 In: *Genetics* 160.3, pp. 1217–1229.
- 443 Bever, JD, SA Mangan, and HM Alexander (2015). “Maintenance of plant species diversity by pathogens”. In: *Annual review*  
444 *of ecology, evolution, and systematics* 46, pp. 305–325.
- 445 Browning, BL, Y Zhou, and SR Browning (2018). “A one-penny imputed genome from next-generation reference panels”. In:  
446 *The American Journal of Human Genetics* 103.3, pp. 338–348.
- 447 Bruns, EL, J Antonovics, and M Hood (2018). “Is there a disease-free halo at species range limits? The co-distribution of  
448 anther-smut disease and its host species”. In: *Journal of Ecology*.
- 449 Bürkner, PC (2017). “brms: An R Package for Bayesian Multilevel Models Using Stan”. In: *Journal of Statistical Software*  
450 80.1, pp. 1–28.
- 451 Chandran, D, J Rickert, Y Huang, MA Steinwand, SK Marr, and MC Wildermuth (2014). “Atypical E2F transcriptional  
452 repressor DEL1 acts at the intersection of plant growth and immunity by controlling the hormone salicylic acid”. In: *Cell*  
453 *host & microbe* 15.4, pp. 506–513.
- 454 Chhatre, VE, LM Evans, SP DiFazio, and SR Keller (2018). “Adaptive introgression and maintenance of a trispecies hybrid  
455 complex in range-edge populations of *Populus*”. In: *Molecular ecology*.
- 456 Chhatre, VE, KC Fetter, AV Gougherty, MC Fitzpatrick, RY Soolanayakanahally, RS Zalensy, and SR Keller (2019). “Climatic  
457 niche predicts the landscape structure of locally adaptive standing genetic variation”. In: *BioRxiv*, p. 817411.
- 458 Christe, C, KN Stölting, L Bresadola, B Fussi, B Heinze, D Wegmann, and C Lexer (2016). “Selection against recombinant  
459 hybrids maintains reproductive isolation in hybridizing *Populus* species despite F1 fertility and recurrent gene flow”. In:  
460 *Molecular Ecology* 25.11, pp. 2482–2498.
- 461 Danecek, P, A Auton, G Abecasis, CA Albers, E Banks, MA DePristo, RE Handsaker, G Lunter, GT Marth, ST Sherry, et al.  
462 (2011). “The variant call format and VCFtools”. In: *Bioinformatics* 27.15, pp. 2156–2158.
- 463 Dangl, JL and JD Jones (2001). “Plant pathogens and integrated defence responses to infection”. In: *nature* 411.6839, p. 826.
- 464 DiFazio, SP, GT Slavov, and CP Joshi (2011). “*Populus*: a premier pioneer system for plant genomics”. In: Enfield, NH:  
465 Science Publishers, pp. 1–28.
- 466 Eckenwalder, JE (1996). “Systematics and evolution of *Populus*”. In: *Biology of Populus and its implications for management*  
467 *and conservation*. Ed. by R Stettler, T Bradshaw, P Heilman, and T Hinckley. Ottawa: NRC Research Press. Chap. 1,  
468 pp. 7–32.
- 469 Elshire, RJ, JC Glaubitz, Q Sun, JA Poland, K Kawamoto, ES Buckler, and SE Mitchell (2011). “A robust, simple genotyping-  
470 by-sequencing (GBS) approach for high diversity species”. In: *PloS one* 6.5, e19379.

- 471 Evans, LM, GT Slavov, E Rodgers-Melnick, J Martin, P Ranjan, W Muchero, AM Brunner, W Schackwitz, L Gunter, JG Chen,  
472 et al. (2014). “Population genomics of *Populus trichocarpa* identifies signatures of selection and adaptive trait associations”.  
473 In: *Nature genetics* 46.10, p. 1089.
- 474 Farquhar, GD, MH O’Leary, and JA Berry (1982). “On the relationship between carbon isotope discrimination and the  
475 intercellular carbon dioxide concentration in leaves”. In: *Functional Plant Biology* 9.2, pp. 121–137.
- 476 Feau, N, DL Joly, and RC Hamelin (2007). “Poplar leaf rusts: model pathogens for a model tree”. In: *Botany* 85.12, pp. 1127–  
477 1135.
- 478 Fetter, KC, S Eberhardt, RS Barclay, S Wing, and SR Keller (2019). “StomataCounter: a neural network for automatic stomata  
479 identification and counting”. In: *New Phytologist* 223.3, pp. 1671–1681.
- 480 Floate, KD, J Godbout, MK Lau, N Isabel, and TG Whitham (2016). “Plant–herbivore interactions in a trispecific hybrid  
481 swarm of *Populus*: assessing support for hypotheses of hybrid bridges, evolutionary novelty and genetic similarity”. In: *New*  
482 *Phytologist* 209.2, pp. 832–844.
- 483 Gelman, A (2008). “Scaling regression inputs by dividing by two standard deviations”. In: *Statistics in medicine* 27.15,  
484 pp. 2865–2873.
- 485 Glaubitz, JC, TM Casstevens, F Lu, J Harriman, RJ Elshire, Q Sun, and ES Buckler (2014). “TASSEL-GBS: a high capacity  
486 genotyping by sequencing analysis pipeline”. In: *PloS one* 9.2, e90346.
- 487 Goldberg, TL, EC Grant, KR Inendino, TW Kassler, JE Claussen, and DP Philipp (2005). “Increased infectious disease  
488 susceptibility resulting from outbreeding depression”. In: *Conservation Biology* 19.2, pp. 455–462.
- 489 Gonzales-Vigil, E, CA Hefer, ME von Loessl, J La Mantia, and SD Mansfield (2017). “Exploiting natural variation to uncover  
490 an alkene biosynthetic enzyme in poplar”. In: *The Plant Cell*, tpc–00338.
- 491 Goulet, BE, F Roda, and R Hopkins (2017). “Hybridization in plants: old ideas, new techniques”. In: *Plant physiology* 173.1,  
492 pp. 65–78.
- 493 Kaluthota, S, DW Pearce, LM Evans, MG Letts, TG Whitham, and SB Rood (2015). “Higher photosynthetic capacity from  
494 higher latitude: foliar characteristics and gas exchange of southern, central and northern populations of *Populus angustifolia*”.  
495 In: *Tree physiology* 35.9, pp. 936–948.
- 496 Kliebenstein, DJ (2016). “False idolatry of the mythical growth versus immunity tradeoff in molecular systems plant  
497 pathology”. In: *Physiological and Molecular Plant Pathology* 95, pp. 55–59.
- 498 La Mantia, J, J Klápště, YA El-Kassaby, S Azam, RD Guy, CJ Douglas, SD Mansfield, and R Hamelin (2013). “Association  
499 analysis identifies *Melampsora* × *columbiana* poplar leaf rust resistance SNPs”. In: *PLoS One* 8.11, e78423.
- 500 Lê, S, J Josse, F Husson, et al. (2008). “FactoMineR: an R package for multivariate analysis”. In: *Journal of statistical software*  
501 25.1, pp. 1–18.
- 502 Li, H and R Durbin (2009). “Fast and accurate short read alignment with Burrows–Wheeler transform”. In: *bioinformatics*  
503 25.14, pp. 1754–1760.

- 504 McKown, AD, RD Guy, L Quamme, J Klápště, J La Mantia, C Constabel, YA El-Kassaby, RC Hamelin, M Zifkin, and  
505 M Azam (2014). “Association genetics, geography and ecophysiology link stomatal patterning in *Populus trichocarpa* with  
506 carbon gain and disease resistance trade-offs”. In: *Molecular ecology* 23.23, pp. 5771–5790.
- 507 McKown, AD, J Klápště, RD Guy, OR Corea, S Fritsche, J Ehling, YA El-Kassaby, and SD Mansfield (2019). “A role for  
508 SPEECHLESS in the integration of leaf stomatal patterning with the growth vs disease trade-off in poplar.” In: *The New  
509 phytologist*.
- 510 Melotto, M, W Underwood, J Koczan, K Nomura, and SY He (2006). “Plant stomata function in innate immunity against  
511 bacterial invasion”. In: *Cell* 126.5, pp. 969–980.
- 512 Messina, FJ, SL Durham, JH Richards, and DE McArthur (2002). “Trade-off between plant growth and defense? A comparison  
513 of sagebrush populations”. In: *Oecologia* 131.1, pp. 43–51.
- 514 Muir, CD (2020). “A stomatal model of anatomical tradeoffs between gas exchange and pathogen colonization”. In: *bioRxiv*,  
515 p. 871228.
- 516 – (2015). “Making pore choices: repeated regime shifts in stomatal ratio”. In: *Proceedings of the Royal Society B: Biological  
517 Sciences* 282.1813, p. 20151498.
- 518 Obeso, JR (2002). “The costs of reproduction in plants”. In: *New Phytologist* 155.3, pp. 321–348.
- 519 Palacio-López, K, B Beckage, S Scheiner, and J Molofsky (2015). “The ubiquity of phenotypic plasticity in plants: a synthesis”.  
520 In: *Ecology and evolution* 5.16, pp. 3389–3400.
- 521 Roche, B and R Fritz (1998). “Effects of host plant hybridization on resistance to willow leaf rust caused by *Melampsora* sp.”  
522 In: *European Journal of Forest Pathology* 28.4, pp. 259–270.
- 523 Rohart, F, B Gautier, A Singh, and KA Lê Cao (2017). “mixOmics: An R package for ‘omics feature selection and multiple  
524 data integration”. In: *PLoS computational biology* 13.11, e1005752.
- 525 Sack, L and TN Buckley (2016). “The developmental basis of stomatal density and flux”. In: *Plant Physiology* 171.4, pp. 2358–  
526 2363.
- 527 Schluter, D, TD Price, and L Rowe (1991). “Conflicting selection pressures and life history trade-offs”. In: *Proc. R. Soc. Lond.  
528 B* 246.1315, pp. 11–17.
- 529 Schneider, CA, WS Rasband, and KW Eliceiri (2012). “NIH Image to ImageJ: 25 years of image analysis”. In: *Nature methods*  
530 9.7, p. 671.
- 531 Suarez-Gonzalez, A, C Lexer, and QC Cronk (2018). “Adaptive introgression: a plant perspective”. In: *Biology letters* 14.3,  
532 p. 20170688.
- 533 Tian, D, M Traw, J Chen, M Kreitman, and J Bergelson (2003). “Fitness costs of R-gene-mediated resistance in *Arabidopsis  
534 thaliana*”. In: *Nature* 423.6935, p. 74.
- 535 Tuskan, GA et al. (2006). “The genome of black cottonwood, *Populus trichocarpa* (Torr. & Gray)”. In: *science* 313.5793,  
536 pp. 1596–1604.

- 537 Ullah, C, CJ Tsai, SB Unsicker, L Xue, M Reichelt, J Gershenzon, and A Hammerbacher (2018). “Salicylic acid activates  
538 poplar defense against the biotrophic rust fungus *Melampsora larici-populina* via increased biosynthesis of catechin and  
539 proanthocyanidins”. In: *New Phytologist*.
- 540 Van Kraayenoord, C, G Laundon, and A Spiers (1974). “Poplar rusts invade New Zealand.” In: *Plant disease reporter* 58.5,  
541 pp. 423–427.
- 542 White, J, B Vaughn, and S Michel (2011). “Stable Isotopic Composition of Atmospheric Carbon Dioxide ( $^{13}\text{C}$  and  $^{18}\text{O}$ )  
543 from the NOAA ESRL Carbon Cycle Cooperative Global Air Sampling Network, 1990–2014, Version: 2015-10-26.” In:  
544 *University of Colorado, Institute of Arctic and Alpine Research (INSTAAR)*.
- 545 Whitham, TG (1989). “Plant hybrid zones as sinks for pests”. In: *Science*, pp. 1490–1493.



546 **X. SUPPORTING INFORMATION**

Table S3: Distribution families used in Bayesian multi-level models for rescaled and unscaled data. Models were fit with brms (Bürkner, 2017).

| Trait                 | Distribution family for rescaled data |             |              | Distribution family for unscaled data |                  |                  |
|-----------------------|---------------------------------------|-------------|--------------|---------------------------------------|------------------|------------------|
|                       | admixed                               | hybrid set  | filial class | admixed                               | hybrid set       | filial class     |
| $R_1$                 | cumulative                            | cumulative  | cumulative   | cumulative                            | cumulative       | cumulative       |
| $R_2$                 | cumulative                            | cumulative  | cumulative   | cumulative                            | cumulative       | cumulative       |
| %C                    | student                               | student     | student      | student                               | student          | student          |
| %N                    | student                               | student     | gaussian     | lognormal                             | lognormal        | student          |
| CN                    | student                               | student     | student      | lognormal                             | lognormal        | lognormal        |
| $\Delta^{13}\text{C}$ | student                               | student     | student      | student                               | student          | student          |
| $\delta^{15}\text{N}$ | gaussian                              | gaussian    | gaussian     | student                               | student          | gaussian         |
| SLA                   | gaussian                              | gaussian    | gaussian     | gaussian                              | student          | student          |
| CCI                   | gaussian                              | gaussian    | gaussian     | lognormal                             | student          | student          |
| $G$                   | gaussian                              | gaussian    | gaussian     | lognormal                             | lognormal        | lognormal        |
| $D_U$                 | skew-normal                           | skew-normal | skew-normal  | student                               | student          | student          |
| $D_L$                 | student                               | student     | student      | zero-inflated-poisson                 | hurdle-poisson   | hurdle-poisson   |
| $S_U$                 | skew-normal                           | skew-normal | skew-normal  | negbin                                | negbin           | negbin           |
| $S_L$                 | student                               | student     | student      | hurdle-lognormal                      | hurdle-lognormal | hurdle-lognormal |
| $f_{S_U}$             | skew-normal                           | skew-normal | skew-normal  | lognormal                             | lognormal        | lognormal        |
| $f_{S_L}$             | student                               | student     | student      | hurdle-lognormal                      | hurdle-lognormal | hurdle-lognormal |
| $f_S$                 | student                               | student     | student      | lognormal                             | lognormal        | lognormal        |
| $g_{s,\text{max}U}$   | skew-normal                           | skew-normal | skew-normal  | hurdle-lognormal                      | hurdle-lognormal | hurdle-lognormal |
| $g_{s,\text{max}L}$   | student                               | student     | student      | student                               | student          | student          |
| $g_{s,\text{max}}$    | student                               | student     | student      | student                               | student          | student          |
| $U_U$                 | skew-normal                           | skew-normal | skew-normal  | hurdle-lognormal                      | hurdle-lognormal | hurdle-lognormal |
| $U_L$                 | student                               | student     | student      | lognormal                             | lognormal        | lognormal        |
| SR                    | skew-normal                           | skew-normal | skew-normal  | gaussian                              | gaussian         | gaussian         |
| AR                    | skew-normal                           | skew-normal | skew-normal  | gaussian                              | gaussian         | gaussian         |
| $f_{S_R}$             | skew-normal                           | skew-normal | skew-normal  | gaussian                              | gaussian         | gaussian         |

Table S4: Multi-response models tested with LOO cross validation. The responses in each model were  $R_1$  and  $R_2$ . Models were fit and evaluated with brms (Bürkner, 2017).  $\Delta$ ELPD is the expected log point wise predictive density for a new dataset, a measure of difference of the fit of the best model to itself.  $A$ ,  $Z$ , and  $I$  are the matrix of garden xy coordinates, expected ancestry proportion, and the random effects of individual, respectively.

| Model ID | Model                                                                                                                   | $\Delta$ ELPD |
|----------|-------------------------------------------------------------------------------------------------------------------------|---------------|
| 1        | $D_U + D_L + S_U + S_L + fS + g_{s,max} + SR + AR + G + \Delta^{13}C + \delta^{15}N + CN + SLA + CCI + A + Z + I$       | 0.0           |
| 2        | $D_U + D_L + S_U + S_L + fS + g_{s,max} + SR + AR + fsR + G + \Delta^{13}C + \delta^{15}N + CN + SLA + CCI + A + Z + I$ | -4.3          |
| 3        | $fS + g_{s,max} + SR + AR + fsR + G + \Delta^{13}C + \delta^{15}N + CN + SLA + CCI + A + Z + I$                         | -21.8         |
| 4        | $fS + g_{s,max} + SR + AR + G + \Delta^{13}C + \delta^{15}N + CN + SLA + CCI + A + Z + I$                               | -23.0         |

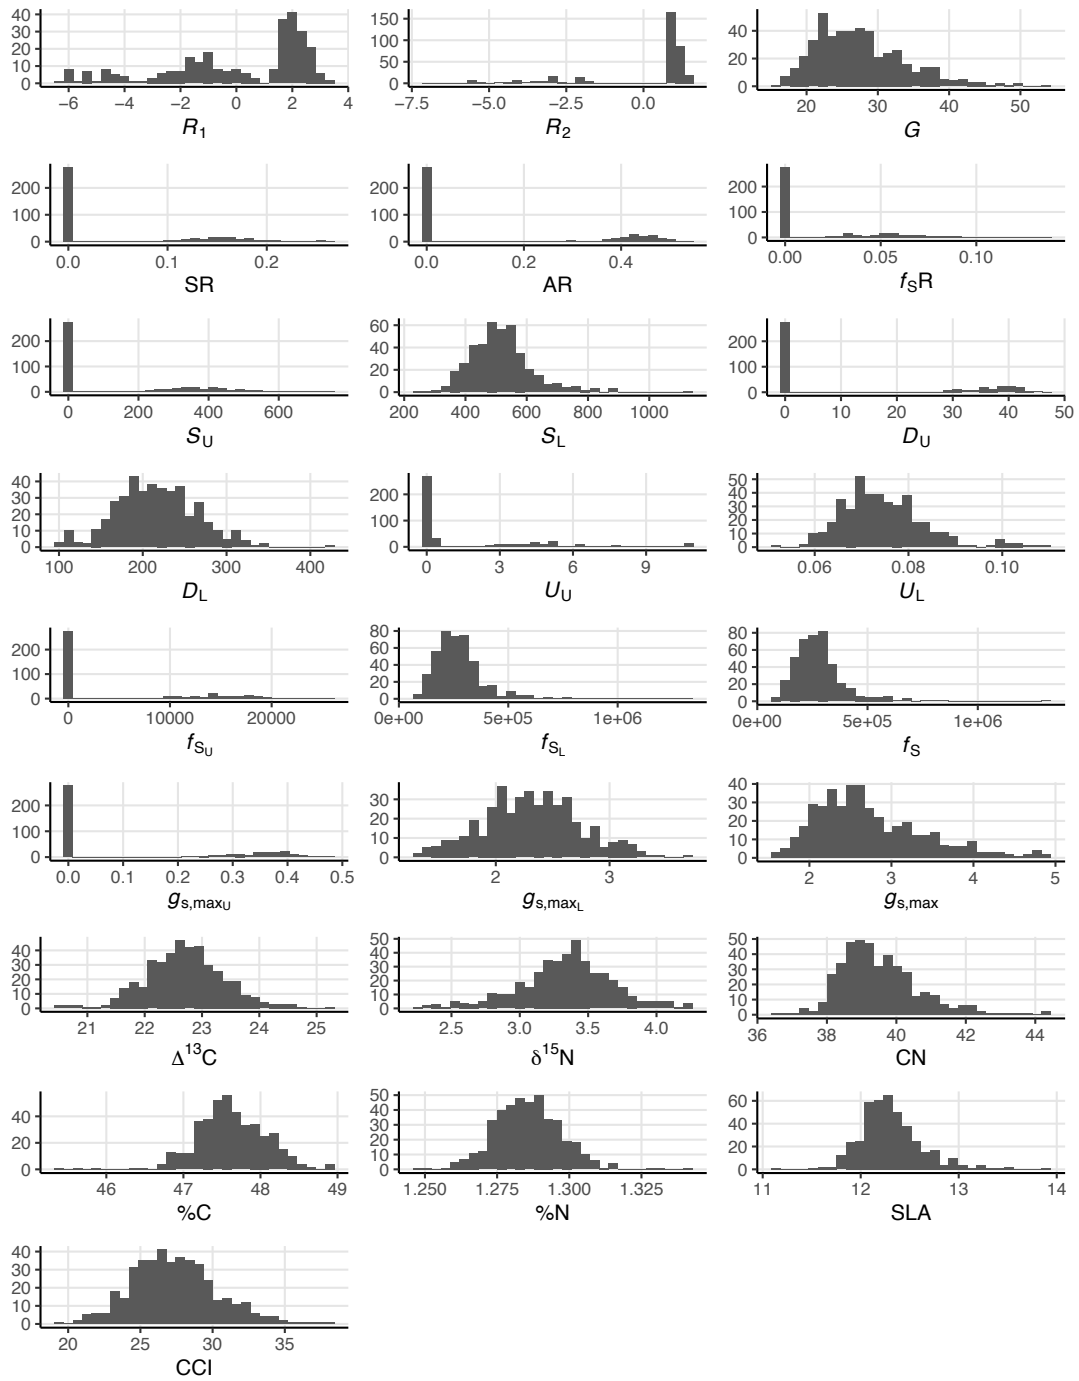

Figure S1: Distribution of traits modelled as BLUPs ( $R_1$  and  $R_2$ ) and mBLUPs (remaining traits). See Table 1 for trait abbreviations and units.

547

548

...

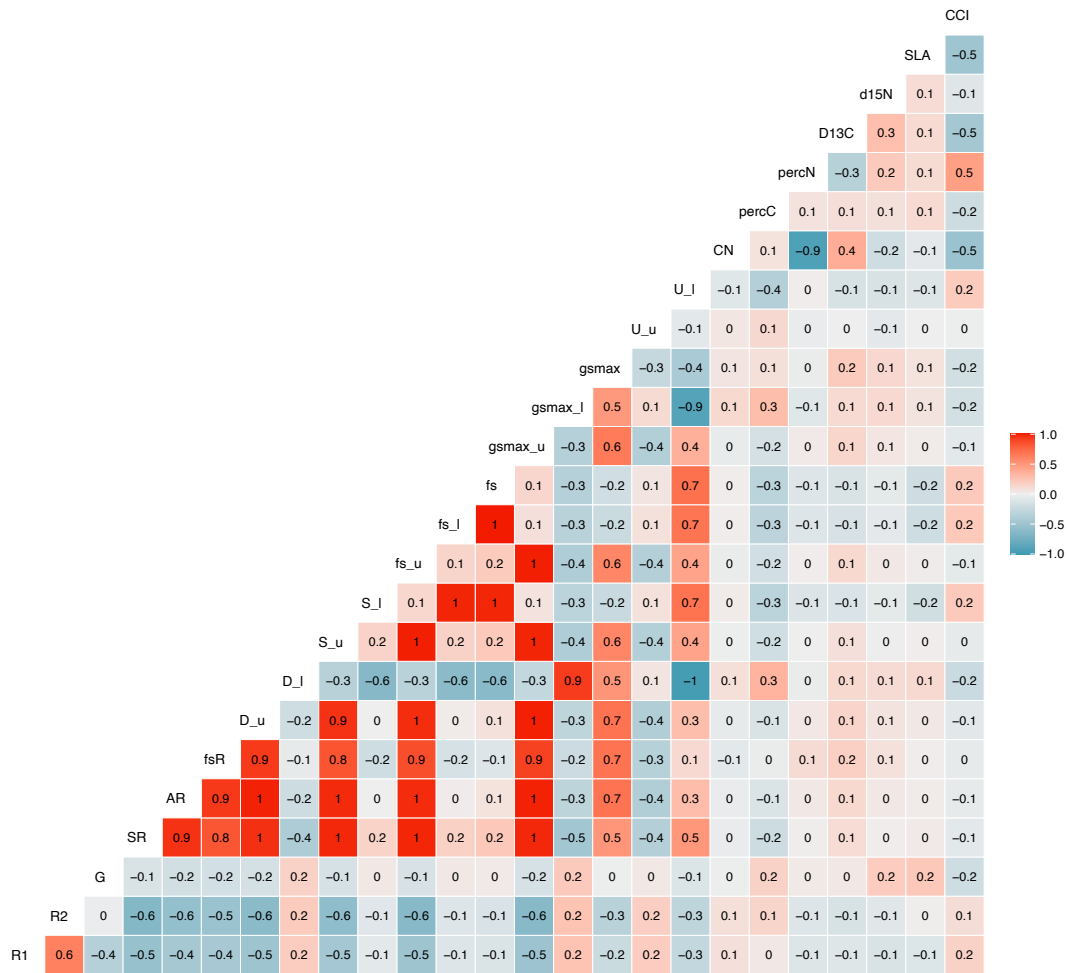

Figure S2: Pairwise Pearson's correlation coefficients. See Table 1 for trait abbreviations and units.

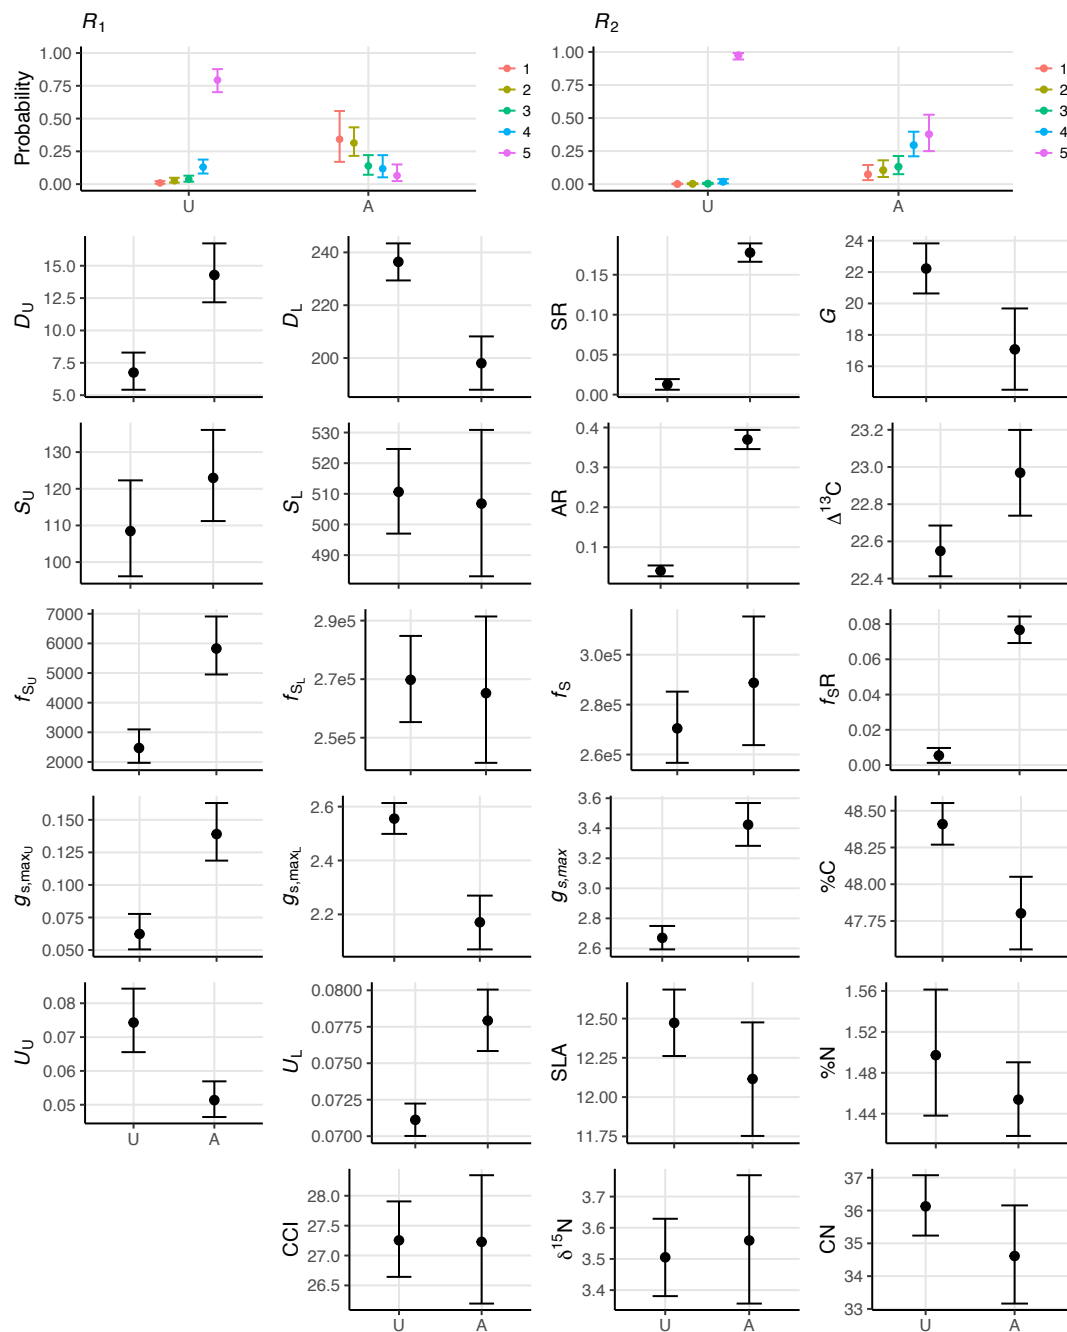

Figure S3: Conditional effects of admixture status on trait variation. See Table 1 for trait definitions. Abbreviations: U, unadmixed; A, admixed.

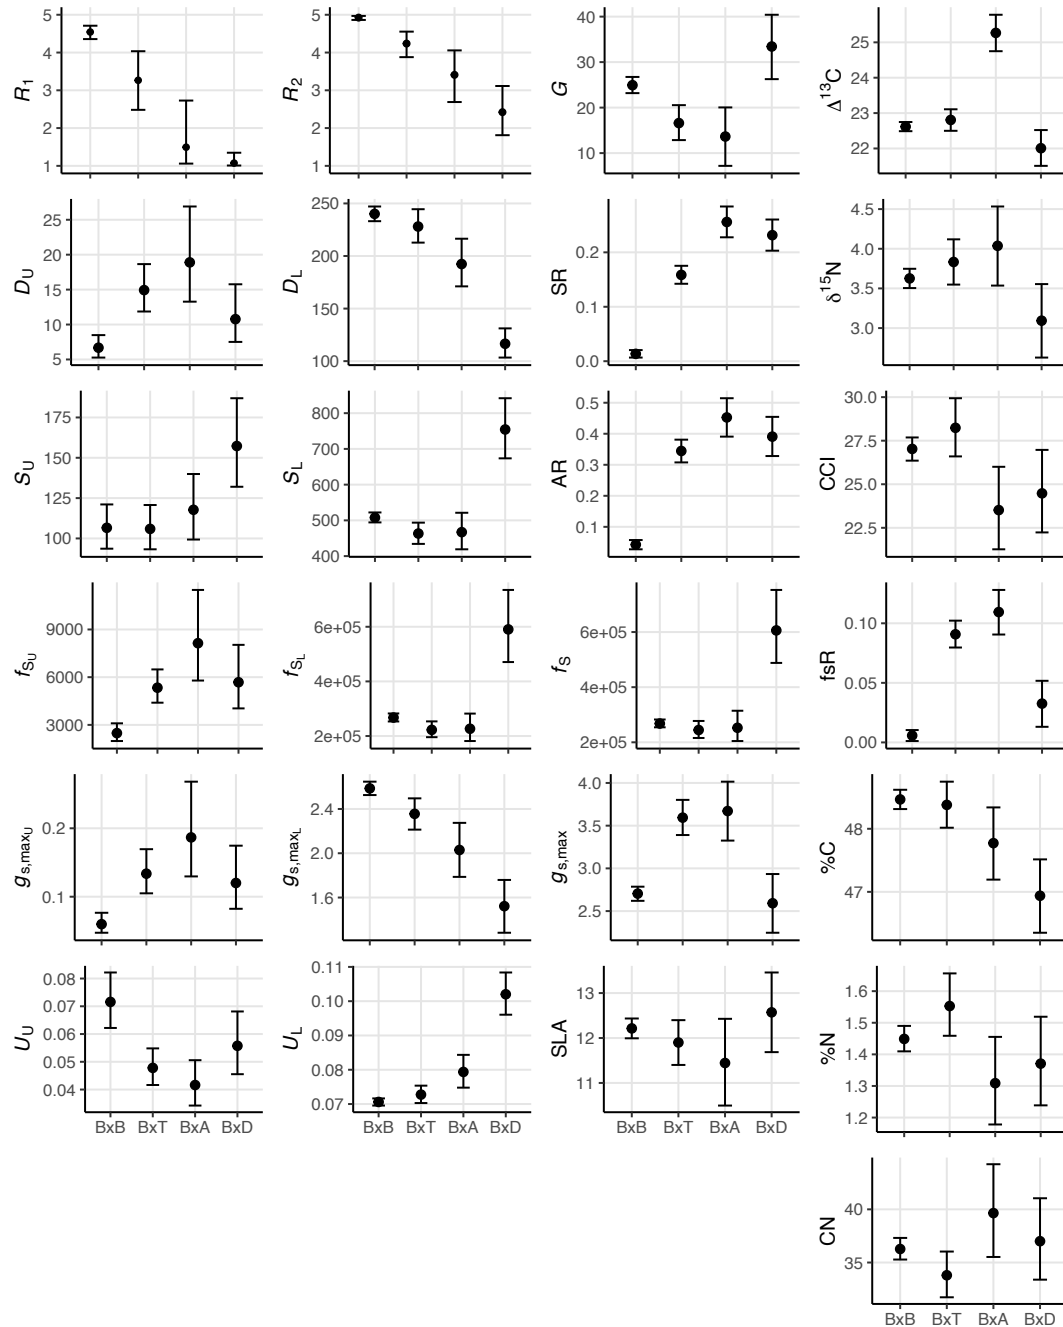

Figure S4: Conditional effects of hybrid set on trait variation. See Table 1 for trait definitions.

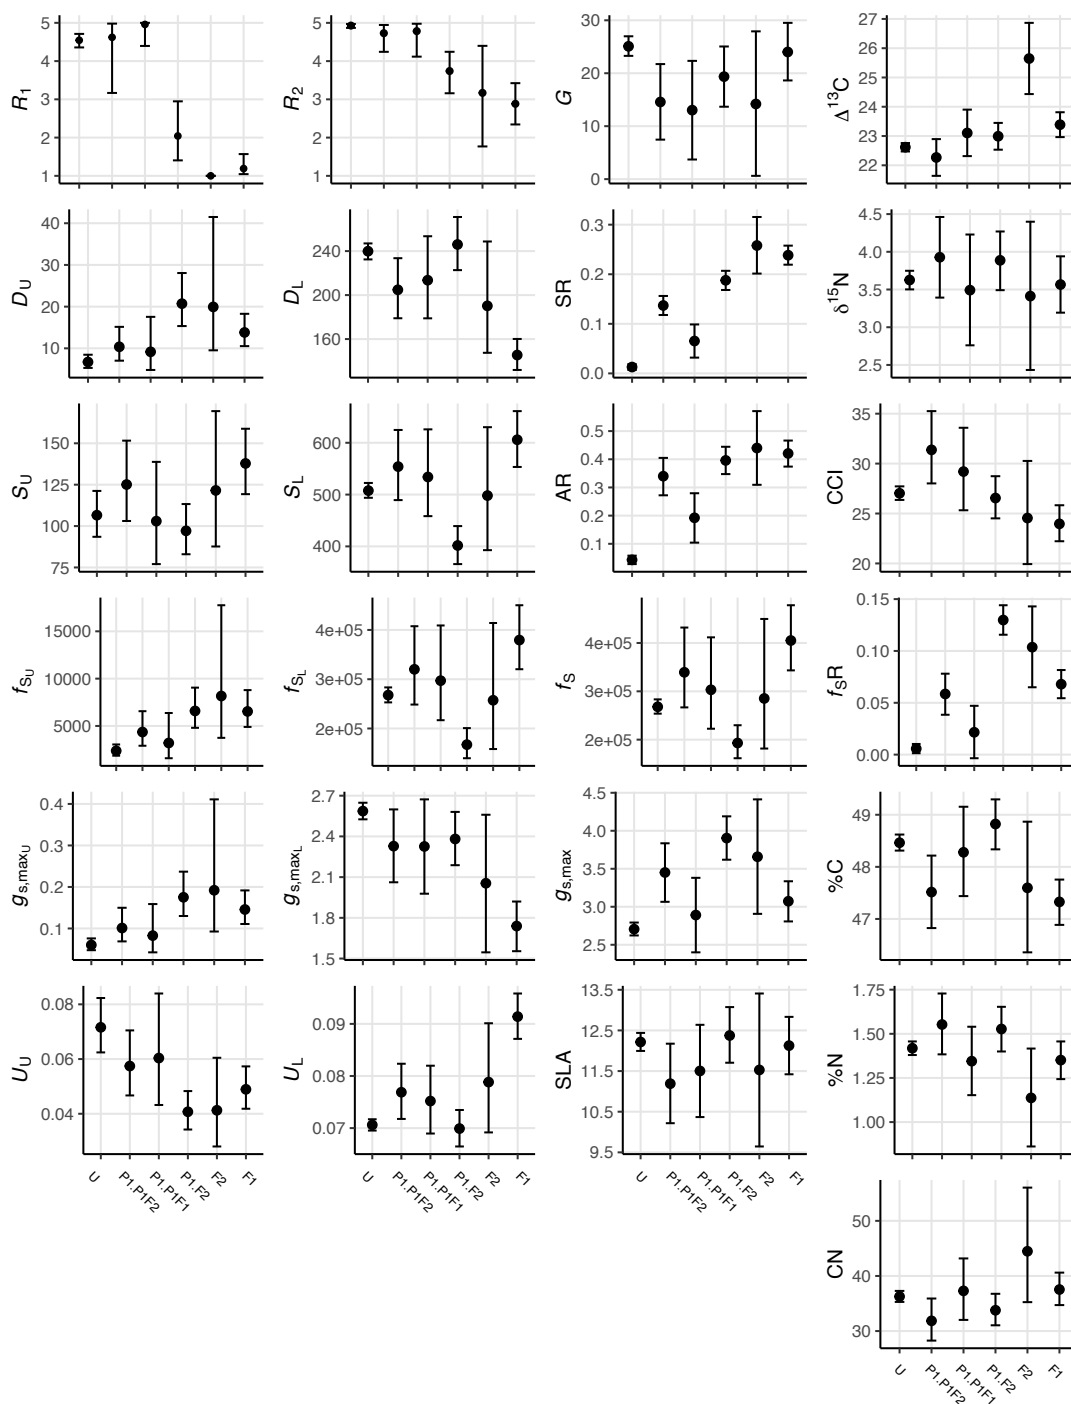

Figure S5: Variation of unscaled traits by filial generation. See Table 1 for trait definitions; abbreviations; U, unadmixed.



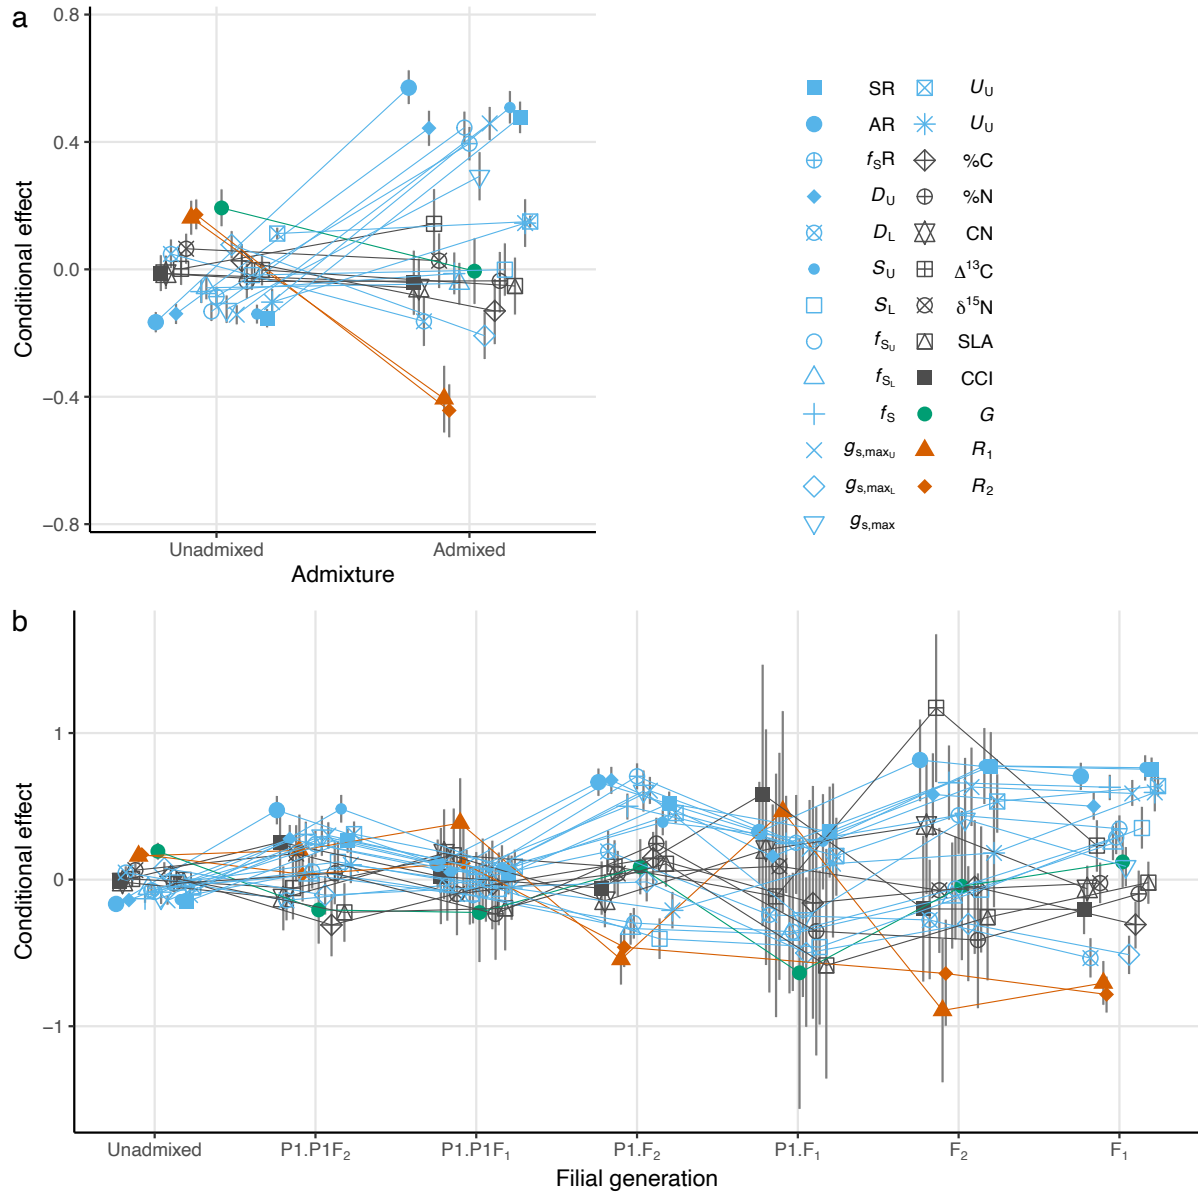

Figure S6: Variation of rescaled traits by admixture status and filial generation (Eq. 8). See Table 1 for trait abbreviations.
